# Supplementary material for: Genetic susceptibility to adverse arsenic-related cardiometabolic outcomes: a systematic review
Source: publisher site journal article supplement (doi:10.1515/reveh-2025-0041), 2025-06-26
Supplement: Supplementary file 1 [file j_reveh-2025-0041_suppl_001.docx]

**Appendix**

van Daalen *et al.*, Genetic susceptibility to adverse arsenic-related cardiometablic outcomes: a systematic review.

**Includes:**

- **Supplement Table 1** Preferred Items for Systematic Reviews and Meta-analyses (PRIMSA) Checklist.
- **Supplement Table 2** Search strategy used in July 2019 and re-run in April 2023.
- **Supplement Table 3** Overview of studies excluded in the full-text review and their reason for exclusion.
- **Supplement Table 4** Overview of the SNPs investigated in the included studies.
- **Supplement Table 5** Quality assessment of cohort or case-cohort studies.
- **Supplement Table 6** Quality assessment of included case-control studies.
- **Supplement Table 7** Quality assessment of included cross-sectional studies.

| **Supplement Table 1 Preferred Items for Systematic Reviews and Meta-analyses (PRIMSA) Checklist.** | | | |
| --- | --- | --- | --- |
| **Section and Topic** | **Item #** | **Checklist item** | **Location where item is reported** |
| **TITLE** | | |  |
| Title | 1 | Identify the report as a systematic review. | Page 1 |
| **ABSTRACT** | | |  |
| Abstract | 2 | See the PRISMA 2020 for Abstracts checklist. | Page 2 |
| **INTRODUCTION** | | |  |
| Rationale | 3 | Describe the rationale for the review in the context of existing knowledge. | Page 3 |
| Objectives | 4 | Provide an explicit statement of the objective(s) or question(s) the review addresses. | Page 3 |
| **METHODS** | | |  |
| Eligibility criteria | 5 | Specify the inclusion and exclusion criteria for the review and how studies were grouped for the syntheses. | Page 4-5 |
| Information sources | 6 | Specify all databases, registers, websites, organisations, reference lists and other sources searched or consulted to identify studies. Specify the date when each source was last searched or consulted. | Page 4 |
| Search strategy | 7 | Present the full search strategies for all databases, registers and websites, including any filters and limits used. | Supplement Table 2 |
| Selection process | 8 | Specify the methods used to decide whether a study met the inclusion criteria of the review, including how many reviewers screened each record and each report retrieved, whether they worked independently, and if applicable, details of automation tools used in the process. | Page 5 |
| Data collection process | 9 | Specify the methods used to collect data from reports, including how many reviewers collected data from each report, whether they worked independently, any processes for obtaining or confirming data from study investigators, and if applicable, details of automation tools used in the process. | Page 5-6 |
| Data items | 10a | List and define all outcomes for which data were sought. Specify whether all results that were compatible with each outcome domain in each study were sought (e.g. for all measures, time points, analyses), and if not, the methods used to decide which results to collect. | Page 4 |
| 10b | List and define all other variables for which data were sought (e.g. participant and intervention characteristics, funding sources). Describe any assumptions made about any missing or unclear information. | Page 4 |
| Study risk of bias assessment | 11 | Specify the methods used to assess risk of bias in the included studies, including details of the tool(s) used, how many reviewers assessed each study and whether they worked independently, and if applicable, details of automation tools used in the process. | Page 6 |
| Effect measures | 12 | Specify for each outcome the effect measure(s) (e.g. risk ratio, mean difference) used in the synthesis or presentation of results. | Page 5-6 |
| Synthesis methods | 13a | Describe the processes used to decide which studies were eligible for each synthesis (e.g. tabulating the study intervention characteristics and comparing against the planned groups for each synthesis (item #5)). | Page 7 |
| 13b | Describe any methods required to prepare the data for presentation or synthesis, such as handling of missing summary statistics, or data conversions. | Page 7 |
| 13c | Describe any methods used to tabulate or visually display results of individual studies and syntheses. | Page 7 |
| 13d | Describe any methods used to synthesize results and provide a rationale for the choice(s). If meta-analysis was performed, describe the model(s), method(s) to identify the presence and extent of statistical heterogeneity, and software package(s) used. | Page 7 |
| 13e | Describe any methods used to explore possible causes of heterogeneity among study results (e.g. subgroup analysis, meta-regression). | NA |
| 13f | Describe any sensitivity analyses conducted to assess robustness of the synthesized results. | NA |
| Reporting bias assessment | 14 | Describe any methods used to assess risk of bias due to missing results in a synthesis (arising from reporting biases). | Page 7 |
| Certainty assessment | 15 | Describe any methods used to assess certainty (or confidence) in the body of evidence for an outcome. | Page 6 |
| **RESULTS** | | |  |
| Study selection | 16a | Describe the results of the search and selection process, from the number of records identified in the search to the number of studies included in the review, ideally using a flow diagram. | Page 7 |
| 16b | Cite studies that might appear to meet the inclusion criteria, but which were excluded, and explain why they were excluded. | Supplement table 4 |
| Study characteristics | 17 | Cite each included study and present its characteristics. | Table 1 |
| Risk of bias in studies | 18 | Present assessments of risk of bias for each included study. | Supplement table 6-8 |
| Results of individual studies | 19 | For all outcomes, present, for each study: (a) summary statistics for each group (where appropriate) and (b) an effect estimate and its precision (e.g. confidence/credible interval), ideally using structured tables or plots. | Table 2 |
| Results of syntheses | 20a | For each synthesis, briefly summarise the characteristics and risk of bias among contributing studies. | Supplement table 6-8  Page 9-10 |
| 20b | Present results of all statistical syntheses conducted. If meta-analysis was done, present for each the summary estimate and its precision (e.g. confidence/credible interval) and measures of statistical heterogeneity. If comparing groups, describe the direction of the effect. | Page 10-14  Table 2 |
| 20c | Present results of all investigations of possible causes of heterogeneity among study results. | NA |
| 20d | Present results of all sensitivity analyses conducted to assess the robustness of the synthesized results. | NA |
| Reporting biases | 21 | Present assessments of risk of bias due to missing results (arising from reporting biases) for each synthesis assessed. | NA |
| Certainty of evidence | 22 | Present assessments of certainty (or confidence) in the body of evidence for each outcome assessed. | Page 10-14  Table 2 |
| **DISCUSSION** | | |  |
| Discussion | 23a | Provide a general interpretation of the results in the context of other evidence. | Page 14-16 |
| 23b | Discuss any limitations of the evidence included in the review. | Page 14-16 |
| 23c | Discuss any limitations of the review processes used. | Page 14-16 |
| 23d | Discuss implications of the results for practice, policy, and future research. | Page 14-16 |
| **OTHER INFORMATION** | | |  |
| Registration and protocol | 24a | Provide registration information for the review, including register name and registration number, or state that the review was not registered. | Page 3 |
| 24b | Indicate where the review protocol can be accessed, or state that a protocol was not prepared. | Page 3 |
| 24c | Describe and explain any amendments to information provided at registration or in the protocol. | Page 3 |
| Support | 25 | Describe sources of financial or non-financial support for the review, and the role of the funders or sponsors in the review. | Page 17 |
| Competing interests | 26 | Declare any competing interests of review authors. | Page 1 |
| Availability of data, code and other materials | 27 | Report which of the following are publicly available and where they can be found: template data collection forms; data extracted from included studies; data used for all analyses; analytic code; any other materials used in the review. | All data is in the tables + appendix |

*From:*  Page MJ, McKenzie JE, Bossuyt PM, Boutron I, Hoffmann TC, Mulrow CD, et al. The PRISMA 2020 statement: an updated guideline for reporting systematic reviews. BMJ 2021;372:n71. doi: 10.1136/bmj.n71

| **Supplement Table 2 Search strategy used in July 2019 and re-run in April 2023.** | | | |
| --- | --- | --- | --- |
| **Database** | **Keywords** | **Search results** | |
| **#1** 24.07.2019 **#2** 10.04.2023 | |
| PubMed | ("Polymorphism, Genetic"[Mesh] OR "Genetic Predisposition to Disease"[Mesh] OR "Genes"[Mesh] OR "Gene-Environment Interaction"[Mesh] OR genetics [Mesh] OR polymorphism OR gene variant OR SNP OR gene OR single nucleotide polymorphism OR genetic variation OR genetic variant) AND (“arsenic”[Mesh] OR “arsenicals”[Mesh] OR “arsenic poisoning”[Mesh] OR arsenic OR arsenite OR arsenites OR arsenate OR arsenates OR arsenicals OR arsenic poisoning) | 5671 | 1519 |
| Web of science | TS= (polymorphism* OR genes OR gene OR genetic* OR SNP OR "single nucleotide polymorphism*") AND TS=(arsenic* OR arsenical* OR arsenate* OR arsenite*) | 6223 | 2059 |
| Scopus | TITLE-ABS-KEY ((arsenic*  OR  arsenical*  OR  arsenite*  OR  arsenate* )AND(gene  OR  polymorphism*  OR  genetic*  OR  SNP  OR  genes )) | 9801 | 3676 |
| EMBASE | ((arsenic acid or arsenic poisoning or arsenic or arsenic derivative or arsenic acid derivative) and (gene or polymorphism or genetic or SNP or genes)).af. | 7430 | 3266 |
| TOXLINE via TOXnet | excluding PubMed records and adding synonyms and CAS numbers  (arsenic* OR arsenical* OR arsenite* OR arsenate* OR 7440-38-2[rn])  AND (gene  OR  polymorphism*  OR  genetic*  OR  SNP  OR  genes ) | 2557 | Discontinued* |

* The TOXNET database has retired on December 2019 as part of a broader re-organization of National Library of Medicine’s toxicology information (<https://www.nlm.nih.gov/toxnet/index.html>).

**Supplement Table 3 Definitions and acronyms of environmental arsenic exposure, arsenic metabolites and arsenic metabolism markers used in this systematic review.**

|  | | | | | |
| --- | --- | --- | --- | --- | --- |
| **Arsenic species (iAs and its metabolites)** | | | **Arsenic metabolism markers** | | |
| **Abb.** | **Definition** |  | **Abb.** | **Definition** |  |
| **tAs*** | total arsenic | iAs + MMA + DMA | **PMI** | primary methylation index | MMA/iAs |
| **iAs*** | inorganic arsenic | iAs3+ + iAs5+ | **SMI** | secondary methylation index | DMA/MMA |
| **MMA** | monomethylated arsenic | MMA3+ + MMA5+ | **% iAs** | proportion iAs | (iAs/tAs) x 100 |
| **DMA** | dimethylated arsenic | DMA3+ + DMA5+ | **% MMA** | proportion MMA | (MMA/tAs) x 100 |
|  |  |  | **% DMA** | proportion DMA | (DMA/tAs) x 100 |

*Note, after ingestion, iAs (predominantly iAs5+ in drinking water) is absorbed in the gastro-intestinal tract and undergoes a series of reduction-oxidation and methylation steps to generate monomethylated arsenic (MMA) and, subsequently, dimethylated arsenic (DMA) species, whereby DMA5+ is the human biomethylation endproduct.*

**Supplement Table 4 Overview of studies excluded in the full-text review and their reason for exclusion.** A summary of all reasons of exclusion can be found in **Figure 1**.

| **Full article reference** | **Reason for exclusion** |
| --- | --- |
| Abo-Hashem, E. M., Elwakil, M. A., Shabana, Y. M., El-Metwally, M. A., El-Kannishy, G., Anwar, R., Fawzy, E., Elzayat, M., Saied, N. (2020). CYP2E1 and L-myc EcoRI Gene Polymorphisms and Heavy Metals Exposure in Hepatocellular Carcinoma Patients. International Journal of Cancer Research, 16: 48-53. | No arsenic metabolism, or arsenic-related disease |
| Adonis, M., Martinez, V., Marin, P., & Gil, L. (2005). CYP1A1 and GSTM1 genetic polymorphisms in lung cancer populations exposed to arsenic in drinking water. Xenobiotica, 35(5), 519-530. | Lung cancer |
| Agusa, T., Iwata, H., Fujihara, J., Kunito, T., Takeshita, H., Minh, T. B., ... & Tanabe, S. (2009). Genetic polymorphisms in AS3MT and arsenic metabolism in residents of the Red River Delta, Vietnam. Toxicology and applied pharmacology, 236(2), 131-141. | Arsenic metabolism |
| Agusa, T., Iwata, H., Fujihara, J., Kunito, T., Takeshita, H., Minh, T. B., ... & Tanabe, S. (2010). Genetic polymorphisms in glutathione S-transferase (GST) superfamily and arsenic metabolism in residents of the Red River Delta, Vietnam. Toxicology and applied pharmacology, 242(3), 352-362. | Arsenic metabolism |
| Agusa, T., Kunito, T., Tue, N. M., Lan, V. T. M., Fujihara, J., Takeshita, H., ... & Iwata, H. (2012). Individual variations in arsenicmetabolism in Vietnamese: the association with arsenic exposure and GSTP1 genetic polymorphism. Metallomics, 4(1), 91-100. | Arsenic metabolism |
| Ahmad, S., Arif, B., Akram, Z., Ahmed, M. W., Khan, A. U., Hussain, M. Z., ... & Mahjabeen, I. (2020). Association of intronic polymorphisms (rs1549339, rs13402242) and mRNA expression variations in PSMD1 gene in arsenic-exposed workers. Environmental Science and Pollution Research, 27, 11425-11437. | No arsenic metabolism, or arsenic-related disease |
| Ahsan, H., Chen, Y., Kibriya, M. G., Islam, M. N., Slavkovich, V. N., Graziano, J. H., & Santella, R. M. (2003). Susceptibility to arsenic-induced hyperkeratosis and oxidative stress genes myeloperoxidase and catalase. Cancer letters, 201(1), 57-65. | Skin lesions |
| Ahsan, H., Chen, Y., Kibriya, M. G., Slavkovich, V., Parvez, F., Jasmine, F., ... & Graziano, J. H. (2007). Arsenic metabolism, genetic susceptibility, and risk of premalignant skin lesions in Bangladesh. Cancer Epidemiology Biomarkers & Prevention, 16(6), 1270-1278. | Skin lesions, arsenic metabolism |
| Ahsan, H., Chen, Y., Wang, Q., Slavkovich, V., Graziano, J. H., & Santella, R. M. (2003). DNA repair gene XPD and susceptibility to arsenic-induced hyperkeratosis. Toxicology letters, 143(2), 123-131. | Skin lesions |
| Akyüzlü, D., Kayaalti, Z., Ozdemir, F., Tutkun, E., & Soylemezoglu, T. (2016). Association between multidrug-resistance associated protein 1 (MRP1) G1666A gene polymorphism and urinary arsenic levels. Marmara Pharmaceutical Journal, 20(1). | Arsenic metabolism |
| Al-Forkan, Mohammad, Fahmida Binta Wali, Laila Khaleda, Md Jibran Alam, Rahee Hasan Chowdhury, Amit Datta, Md Zillur Rahman et al. "Association of arsenic-induced cardiovascular disease susceptibility with genetic polymorphisms." Scientific reports 11, no. 1 (2021): 6263. | No arsenic metabolism, or arsenic-related disease |
| Alfimova, M., Kondratyev, N., Korovaitseva, G., Lezheiko, T., Plakunova, V., Gabaeva, M., & Golimbet, V. (2022). A Role of DNA Methylation within the CYP17A1 Gene in the Association of Genetic and Environmental Risk Factors with Stress-Related Manifestations of Schizophrenia. International Journal of Molecular Sciences, 23(20), 12629. | No arsenic metabolism, or arsenic-related disease |
| Aliomrani, M., Sahraian, M. A., Shirkhanloo, H., Sharifzadeh, M., Khoshayand, M. R., & Ghahremani, M. H. (2017). Correlation between heavy metal exposure and GSTM1 polymorphism in Iranian multiple sclerosis patients. Neurological Sciences, 38, 1271-1278. | No arsenic metabolism, or arsenic-related disease |
| Andrew, A. S., Mason, R. A., Kelsey, K. T., Schned, A. R., Marsit, C. J., Nelson, H. H., & Karagas, M. R. (2009). DNA repair genotype interacts with arsenic exposure to increase bladder cancer risk. Toxicology letters, 187(1), 10-14. | Bladder cancer |
| Applebaum, K. M., Karagas, M. R., Hunter, D. J., Catalano, P. J., Byler, S. H., Morris, S., & Nelson, H. H. (2007). Polymorphisms in nucleotide excision repair genes, arsenic exposure, and non-melanoma skin cancer in New Hampshire. Environmental Health Perspectives, 115(8), 1231-1236. | Basal cell carcinoma, squamous cell carcinoma |
| Argos, M., Tong, L., Roy, S., Sabarinathan, M., Ahmed, A., Islam, M. T., ... & Pierce, B. L. (2018). Screening for gene–environment (G× E) interaction using omics data from exposed individuals: an application to gene-arsenic interaction. Mammalian genome, 29, 101-111. | Skin lesions |
| Balakrishnan, P., Jones, M. R., Vaidya, D., Tellez-Plaza, M., Post, W. S., Kaufman, J. D., ... & Navas-Acien, A. (2018). Ethnic, geographic, and genetic differences in arsenic metabolism at low arsenic exposure: A preliminary analysis in the multi-ethnic study of atherosclerosis (mesa). International journal of environmental research and public health, 15(6), 1179. | Arsenic metabolism |
| Balakrishnan, P., Vaidya, D., Franceschini, N., Voruganti, V. S., Gribble, M. O., Haack, K., ... & Navas-Acien, A. (2017). Association of cardiometabolic genes with arsenic metabolism biomarkers in American Indian communities: the Strong Heart Family Study (SHFS). Environmental health perspectives, 125(1), 15-22. | Arsenic metabolism |
| Banerjee, M., Sarkar, J., Das, J. K., Mukherjee, A., Sarkar, A. K., Mondal, L., & Giri, A. K. (2007). Polymorphism in the ERCC2 codon 751 is associated with arsenic-induced premalignant hyperkeratosis and significant chromosome aberrations. Carcinogenesis, 28(3), 672-676. | Skin lesions |
| Banerjee, N., Nandy, S., Kearns, J. K., Bandyopadhyay, A. K., Das, J. K., Majumder, P., ... & Giri, A. K. (2011). Polymorphisms in the TNF-α and IL10 gene promoters and risk of arsenic-induced skin lesions and other nondermatological health effects. Toxicological Sciences, 121(1), 132-139. | Skin lesions, ocular disease, respiratory disease |
| Basu, M., Chakraborty, B., Ghosh, S., Samadder, S., Dutta, S., Roy, A., ... & Panda, C. K. (2020). Divergent molecular profile of PIK3CA gene in arsenic-associated bladder carcinoma. Mutagenesis, 35(6), 499-508. | Not human study (e.g., in vitro, in vivo, plants) |
| Baszuk, P., Stadnik, P., Marciniak, W., Derkacz, R., Jakubowska, A., Cybulski, C., ... & Lener, M. R. (2021). Low Blood-As Levels and Selected Genotypes Appears to Be Promising Biomarkers for Occurrence of Colorectal Cancer in Women. Biomedicines, 9(9), 1105. | Colorectal cancer |
| Beebe-Dimmer, J. L., Iyer, P. T., Nriagu, J. O., Keele, G. R., Mehta, S., Meliker, J. R., ... & Cooney, K. A. (2012). Genetic variation in glutathione S-transferase omega-1, arsenic methyltransferase and methylene-tetrahydrofolate reductase, arsenic exposure and bladder cancer: a case–control study. Environmental Health, 11, 1-15. | Urothelial carcinoma |
| Bhattacharjee, P., Das, N., Chatterjee, D., Banerjee, A., Das, J. K., Basu, S., ... & Giri, A. K. (2013). Association of NALP2 polymorphism with arsenic induced skin lesions and other health effects. Mutation Research/Genetic Toxicology and Environmental Mutagenesis, 755(1), 1-5. | Skin lesions, neurological abnormalities, eye problems, respiratory diseases |
| Borghini, A., Faita, F., Mercuri, A., Minichilli, F., Bustaffa, E., Bianchi, F., & Andreassi, M. G. (2016). Arsenic exposure, genetic susceptibility and leukocyte telomere length in an Italian young adult population. Mutagenesis, 31(5), 539-546. | No arsenic metabolism, or arsenic-related disease |
| Breton, C. V., Zhou, W., Kile, M. L., Houseman, E. A., Quamruzzaman, Q., Rahman, M., ... & Christiani, D. C. (2007). Susceptibility to arsenic-induced skin lesions from polymorphisms in base excision repair genes. Carcinogenesis, 28(7), 1520-1525. | Skin lesions |
| Bustaffa, E., Gorini, F., Bianchi, F., & Minichilli, F. (2020). Factors affecting arsenic methylation in contaminated Italian areas. International Journal of Environmental Research and Public Health, 17(14), 5226. | Arsenic metabolism |
| Caceres, D. D., Werlinger, F., Orellana, M., Jara, M., Rocha, R., Alvarado, S. A., & Luis, Q. (2010). Polymorphism of glutathione S-transferase (GST) variants and its effect on distribution of urinary arsenic species in people exposed to low inorganic arsenic in tap water: an exploratory study. Archives of Environmental & Occupational Health, 65(3), 140-147. | Arsenic metabolism |
| Ćavar, S., Bošnjak, Z., Klapec, T., Barišić, K., Čepelak, I., Jurasović, J., & Milić, M. (2010). Blood selenium, glutathione peroxidase activity and antioxidant supplementation of subjects exposed to arsenic via drinking water. Environmental Toxicology and Pharmacology, 29(2), 138-143. | No arsenic metabolism, or arsenic-related disease |
| Chanda, S., Roy, J., Chakraborty, T., & Mazumder, D. G. (2020). Skin lesions associated with chronic arsenic exposure through food chain is associated with GST and CYP 450 polymorphism. International Journal of Chemical and Environmental Sciences, 1(4), 18-29. | Skin lesions |
| Chanda, S., Roy, J., Guha Mazumder, D., & Chakraborty, T. (2020). Role of glutathione-S-transferase polymorphism on arsenic-induced protein carbonylation and urinary deoxy guanosine status. Exposure and Health, 12, 539-546. | No arsenic metabolism, or arsenic-related disease |
| Chanda, S., Roy, J., Mukhopadhyay, A., Chakraborty, T., & Mazumder, D. G. (2021). Modification of DNMTs Gene Expressions by GST O1 and GST O2 Polymorphism in Chronic Arsenic Exposed People With and Without Malignancy from West Bengal, India. Exposure and Health, 1-12. | Skin lesions |
| Chen, T. H., Huang, J. J., Lee, H. Y., Kung, W. S., Luo, K. H., Lu, J. Y., & Chuang, H. Y. (2021). The association of renal function and plasma metals modified by EGFR and TNF-α gene polymorphisms in metal industrial workers and general population. International Journal of Environmental Research and Public Health, 18(17), 8965. | Duplicate |
| Chen, T. H., Huang, J. J., Lee, H. Y., Kung, W. S., Luo, K. H., Lu, J. Y., & Chuang, H. Y. (2021). The association of renal function and plasma metals modified by EGFR and TNF-α gene polymorphisms in metal industrial workers and general population. International Journal of Environmental Research and Public Health, 18(17), 8965. | Renal function |
| Chen, W. J., Huang, Y. L., Shiue, H. S., Chen, T. W., Lin, Y. F., Huang, C. Y., ... & Hsueh, Y. M. (2014). Renin–angiotensin–aldosterone system related gene polymorphisms and urinary total arsenic is related to chronic kidney disease. Toxicology and applied pharmacology, 279(2), 95-102. | Chronic kidney disease |
| Chen, X., Guo, X., He, P., Nie, J., Yan, X., Zhu, J., ... & Ren, X. (2017). Interactive influence of N6AMT1 and As3MT genetic variations on arsenic metabolism in the population of inner Mongolia, China. Toxicological Sciences, 155(1), 124-134. | Arsenic metabolism |
| Chen, Y. C., Xu, L., Guo, Y. L. L., Su, H. J. J., Hsueh, Y. M., Smith, T. J., ... & Christiani, D. C. (2003). Genetic polymorphism in p53 codon 72 and skin cancer in southwestern Taiwan. Journal of Environmental Science and Health, Part A, 38(1), 201-211. | No arsenic metabolism, or arsenic-related disease |
| Chen, Y. C., Xu, L., Guo, Y. L. L., Su, H. J. J., Smith, T. J., Ryan, L. M., ... & Christiani, D. C. (2004). Polymorphisms in GSTT1 and p53 and urinary transitional cell carcinoma in south-western Taiwan: a preliminary study. Biomarkers, 9(4-5), 386-394. | No arsenic metabolism, or arsenic-related disease |
| Chen, Z., Liu, C., An, L., Zhang, N., Ren, D., Yuan, F., ... & He, G. (2019). Single nucleotide polymorphism rs11191454 in arsenite methyltransferase is associated with flow in Chinese students: a genetic study on flow experience. Journal of Bio-X Research, 2(03), 140-144. | No arsenic metabolism, or arsenic-related disease |
| Cheng Y.-Y., Pan S.-C., Guo H.-R. & Shen K.-H. (2012). Role of genes to modify health effects of environmental exposure. Epidemiology, 23(5 SUPPL. 1), S271. https://doi.org/10.1097/01.ede.0000416871.13121.dc | Conference abstract |
| Cheng, J., Li, Y., He, Q., Luo, L., Zhang, Y., Gao, Y., ... & Sun, D. (2021). Essential hypertension in patients exposed to high-arsenic exposed areas in western China: Genetic susceptibility and urinary arsenic metabolism characteristics. Journal of Trace Elements in Medicine and Biology, 67, 126778. | No arsenic metabolism, or arsenic-related disease |
| Cheng, Y. Y., Guo, H. R., Wang, Y. J., Yang, Y. C., Cheng, H. L., & Chen, C. H. (2011). Functional STK15 Phe31Ile and p53 Pro72Arg polymorphism and bladder cancer in southwestern Taiwan. Epidemiology, 22(1), S136. | Conference abstract |
| Chernoff, M. B., Delgado, D., Tong, L., Chen, L., Oliva, M., Tamayo, L. I., ... & Pierce, B. L. (2023). Sequencing-based fine-mapping and in silico functional characterization of the 10q24. 32 arsenic metabolism efficiency locus across multiple arsenic-exposed populations. PLoS Genetics, 19(1), e1010588. | Arsenic metabolism |
| Chernoff, M., Tong, L., Demanelis, K., Vander Griend, D., Ahsan, H., & Pierce, B. L. (2020). Genetic determinants of reduced arsenic metabolism efficiency in the 10q24. 32 region are associated with reduced AS3MT expression in multiple human tissue types. Toxicological Sciences, 176(2), 382-395. | Arsenic metabolism |
| Chiang, C. I., Huang, Y. L., Chen, W. J., Shiue, H. S., Huang, C. Y., Pu, Y. S., ... & Hsueh, Y. M. (2014). XRCC1 Arg194Trp and Arg399Gln polymorphisms and arsenic methylation capacity are associated with urothelial carcinoma. Toxicology and applied pharmacology, 279(3), 373-379. | Arsenic metabolism, urothelial carcinoma |
| Chiou, H. Y., Hsueh, Y. M., Hsieh, L. L., Hsu, L. I., Hsu, Y. H., Hsieh, F. I., ... & Chen, C. J. (1997). Arsenic methylation capacity, body retention, and null genotypes of glutathione S-transferase M1 and T1 among current arsenic-exposed residents in Taiwan. Mutation Research/Reviews in Mutation Research, 386(3), 197-207. | Arsenic metabolism |
| Chiou, H. Y., Wang, I. H., Hsueh, Y. M., Chiou, S. T., Chou, Y. L., Teh, H. W., & Chen, C. J. (2001). Arsenic Exposure, Null Genotypes of Glutathione S-Transferase M1, T1 and P1, and Risk of Carotid Atherosclerosis among Residents in the Lanyang Basin of Taiwan. Arsenic Exposure and Health Effects IV, 207-219. | Overlapping population with Wang et al. 2007 |
| Chou, Y. L., Chiou, S. T., Hsueh, Y. M., Chiou, H. Y., & Chen, C. J. (2001). A study on the association between carotid atherosclerosis and genetic polymorphisms of apolipoprotein E among various arsenic exposure people. Taiwan Journal of Public Health, 20(5), 365-371. | Unable to access full text |
| Chung, C. J., Bao, B. Y., Lin, Y. C., Huang, Y. L., Shiue, H. S., Ao, P. L., ... & Hsueh, Y. M. (2020). Polymorphism of nucleotide binding domain-like receptor protein 3 (NLRP3) increases susceptibility of total urinary arsenic to renal cell carcinoma. Scientific Reports, 10(1), 6640. | Renal cell carcinoma |
| Chung, C. J., Bao, B. Y., Lin, Y. C., Huang, Y. L., Shiue, H. S., Ao, P. L., ... & Hsueh, Y. M. (2020). Polymorphism of nucleotide binding domain-like receptor protein 3 (NLRP3) increases susceptibility of total urinary arsenic to renal cell carcinoma. Scientific Reports, 10(1), 6640. | Renal cell carcinoma |
| Chung, C. J., Hsueh, Y. M., Bai, C. H., Huang, Y. K., Huang, Y. L., Yang, M. H., & Chen, C. J. (2009). Polymorphisms in arsenic metabolism genes, urinary arsenic methylation profile and cancer. Cancer causes & control, 20, 1653-1661. | Arsenic metabolism |
| Chung, C. J., Huang, C. J., Pu, Y. S., Su, C. T., Huang, Y. K., Chen, Y. T., & Hsueh, Y. M. (2008). Polymorphisms in cell cycle regulatory genes, urinary arsenic profile and urothelial carcinoma. Toxicology and applied pharmacology, 232(2), 203-209. | Urothelial carcinoma |
| Chung, C. J., Huang, C. Y., Pu, Y. S., Shiue, H. S., Su, C. T., & Hsueh, Y. M. (2013). The effect of cigarette smoke and arsenic exposure on urothelial carcinoma risk is modified by glutathione S-transferase M1 gene null genotype. Toxicology and applied pharmacology, 266(2), 254-259. | Urothelial carcinoma |
| Chung, C. J., Pu, Y. S., Su, C. T., Chen, H. W., Huang, Y. K., Shiue, H. S., & Hsueh, Y. M. (2010). Polymorphisms in one-carbon metabolism pathway genes, urinary arsenic profile, and urothelial carcinoma. Cancer Causes & Control, 21, 1605-1613. | Arsenic metabolism |
| Chung, C. J., Pu, Y. S., Su, C. T., Huang, C. Y., & Hsueh, Y. M. (2011). Gene polymorphisms of glutathione S-transferase omega 1 and 2, urinary arsenic methylation profile and urothelial carcinoma. Science of the total environment, 409(3), 465-470. | Arsenic metabolism |
| Cordova, E. J., Valenzuela, O. L., Sánchez-Peña, L. C., Escamilla-Guerrero, G., Hernandez-Zavala, A., Orozco, L., & Razo, L. D. (2014). Nuclear factor erythroid 2-related factor gene variants and susceptibility of arsenic-related skin lesions. Human & experimental toxicology, 33(6), 582-589. | Skin lesions |
| Das, N., Giri, A., Chakraborty, S., & Bhattacharjee, P. (2016). Association of single nucleotide polymorphism with arsenic-induced skin lesions and genetic damage in exposed population of West Bengal, India. Mutation Research/Genetic Toxicology and Environmental Mutagenesis, 809, 50-56. | Skin lesions |
| De Chaudhuri, S., Ghosh, P., Sarma, N., Majumdar, P., Sau, T. J., Basu, S., ... & Giri, A. K. (2008). Genetic variants associated with arsenic susceptibility: study of purine nucleoside phosphorylase, arsenic (+ 3) methyltransferase, and glutathione S-transferase omega genes. Environmental health perspectives, 116(4), 501-505. | Skin lesions |
| De Chaudhuri, S., Mahata, J., Das, J. K., Mukherjee, A., Ghosh, P., Sau, T. J., ... & Roychoudhury, S. (2006). Association of specific p53 polymorphisms with keratosis in individuals exposed to arsenic through drinking water in West Bengal, India. Mutation Research/Fundamental and Molecular Mechanisms of Mutagenesis, 601(1-2), 102-112. | Skin lesions |
| De la Rosa, R., Steinmaus, C., Akers, N. K., Conde, L., Ferreccio, C., Kalman, D., ... & Smith, M. T. (2017). Associations between arsenic (+ 3 oxidation state) methyltransferase (AS3MT) and N‐6 adenine‐specific DNA methyltransferase 1 (N6AMT1) polymorphisms, arsenic metabolism, and cancer risk in a chilean population. Environmental and molecular mutagenesis, 58(6), 411-422. | Arsenic metabolism, lung cancer, bladder cancer |
| De Loma, J., Skröder, H., Raqib, R., Vahter, M., & Broberg, K. (2018). Arsenite methyltransferase (AS3MT) polymorphisms and arsenic methylation in children in rural Bangladesh. Toxicology and Applied Pharmacology, 357, 80-87. | Arsenic metabolism |
| De Loma, J., Vicente, M., Tirado, N., Ascui, F., Vahter, M., Gardon, J., ... & Broberg, K. (2022). Human adaptation to arsenic in Bolivians living in the Andes. Chemosphere, 301, 134764. | Arsenic metabolism |
| Delgado, D. A., Chernoff, M., Huang, L., Tong, L., Chen, L., Jasmine, F., ... & Pierce, B. L. (2021). Rare, protein-altering variants in AS3MT and arsenic metabolism efficiency: A multi-population association study. Environmental health perspectives, 129(4), 047007. | Arsenic metabolism |
| Deng, F., & Guo, X. (2011). Association of 5, 10-Methylenetetrahydrofolate reductase polymorphisms, arsenic metabolism, and arsenic skin lesions in residents chronically exposed to arsenic in drinking water. Epidemiology, 22(1), S135. | Conference abstract |
| Deyssenroth, M. A., Peng, S., Hao, K., Marsit, C. J., & Chen, J. (2022). Placental Gene Transcript Proportions are Altered in the Presence of In Utero Arsenic and Cadmium Exposures, Genetic Variants, and Birth Weight Differences. Frontiers in Genetics, 13, 865449. | No genetic susceptibility, or not SNP |
| Diaz-Villasenor, A., Cruz, L., Cebrian, A., Hernandez-Ramirez, R. U., Hiriart, M., Garcia-Vargas, G., ... & Ostrosky-Wegman, P. (2013). Arsenic exposure and calpain-10 polymorphisms impair the function of pancreatic beta-cells in humans: a pilot study of risk factors for T2DM. PLoS One, 8(1), e51642. | No genetic susceptibility, or not SNP |
| Dilek, K. A., ÖZDEMİR, F., & KAYAALTI, Z. Effect of chronic arsenic exposure and GLUT1 polymorphism in the development of diabetes mellitus. The Turkish Journal Of Occupational/Environmental Medicine and Safety, 1(1 (2)). | Conference abstract |
| Drobná, Z., Martin, E., Kim, K. S., Smeester, L., Bommarito, P., Rubio-Andrade, M., ... & Fry, R. C. (2016). Analysis of maternal polymorphisms in arsenic (+ 3 oxidation state)-methyltransferase AS3MT and fetal sex in relation to arsenic metabolism and infant birth outcomes: Implications for risk analysis. Reproductive Toxicology, 61, 28-38. | Arsenic metabolism |
| Edwards, M., Hall, J., Gong, G., & O’Bryant, S. E. (2014). Arsenic exposure, AS3MT polymorphism, and neuropsychological functioning among rural dwelling adults and elders: a cross-sectional study. Environmental Health, 13, 1-7. | Cognitive functioning |
| Engström, K. S., Broberg, K., Concha, G., Nermell, B., Warholm, M., & Vahter, M. (2007). Genetic polymorphisms influencing arsenic metabolism: evidence from Argentina. Environmental health perspectives, 115(4), 599-605. | Arsenic metabolism |
| Engström, K. S., Hossain, M. B., Lauss, M., Ahmed, S., Raqib, R., Vahter, M., & Broberg, K. (2013). Efficient arsenic metabolism—the AS3MT haplotype is associated with DNA methylation and expression of multiple genes around AS3MT. PloS one, 8(1), e53732. | No arsenic metabolism, or arsenic-related disease |
| Engström, K. S., Nermell, B., Concha, G., Strömberg, U., Vahter, M., & Broberg, K. (2009). Arsenic metabolism is influenced by polymorphisms in genes involved in one-carbon metabolism and reduction reactions. Mutation Research/Fundamental and Molecular Mechanisms of Mutagenesis, 667(1-2), 4-14. | Arsenic metabolism |
| Engström, K. S., Vahter, M., Fletcher, T., Leonardi, G., Goessler, W., Gurzau, E., ... & Broberg, K. (2015). Genetic variation in arsenic (+ 3 oxidation state) methyltransferase (AS3MT), arsenic metabolism and risk of basal cell carcinoma in a E uropean population. Environmental and molecular mutagenesis, 56(1), 60-69. | Arsenic metabolism, basal cell carcinoma |
| Engström, K., Vahter, M., Mlakar, S. J., Concha, G., Nermell, B., Raqib, R., ... & Broberg, K. (2011). Polymorphisms in arsenic (+ III oxidation state) methyltransferase (AS3MT) predict gene expression of AS3MT as well as arsenic metabolism. Environmental health perspectives, 119(2), 182-188. | Arsenic metabolism |
| Eqani, S. A. M. A. S., Khuram, F., Alamdar, A., Tahir, A., Shah, S. T. A., Nasir, A., ... & Shen, H. (2020). Environmental exposure pathway analysis of trace elements and autism risk in Pakistani children population. Science of the Total Environment, 712, 136471. | No arsenic metabolism, or arsenic-related disease |
| Fan, W., Shen, C., Wu, M., Zhou, Z. Y., & Guo, Z. R. (2015). Association and interaction of PPARα, δ, and γ gene polymorphisms with low-density lipoprotein-cholesterol in a Chinese Han population. Genetic Testing and Molecular Biomarkers, 19(7), 379-386. | No arsenic metabolism, or arsenic-related disease |
| Fan, X., Chen, Y., Lu, J., Li, W., Li, X., Guo, H., ... & Xia, H. (2021). AS3MT polymorphism: A risk factor for epilepsy susceptibility and adverse drug reactions to valproic acid and oxcarbazepine treatment in children from south China. Frontiers in Neuroscience, 15, 705297. | No arsenic metabolism, or arsenic-related disease |
| Fang, Y. J., Lin, K. L., Lee, J. H., Luo, K. H., Chen, T. H., Yang, C. C., & Chuang, H. Y. (2022). Interaction between Single Nucleotide Polymorphisms (SNP) of Tumor Necrosis Factor-Alpha (TNF-α) Gene and Plasma Arsenic and the Effect on Estimated Glomerular Filtration Rate (eGFR). International Journal of Environmental Research and Public Health, 19(7), 4404. | Duplicate |
| Fang, Y. J., Lin, K. L., Lee, J. H., Luo, K. H., Chen, T. H., Yang, C. C., & Chuang, H. Y. (2022). Interaction between Single Nucleotide Polymorphisms (SNP) of Tumor Necrosis Factor-Alpha (TNF-α) Gene and Plasma Arsenic and the Effect on Estimated Glomerular Filtration Rate (eGFR). International Journal of Environmental Research and Public Health, 19(7), 4404. | Renal function |
| Fernandez, M. I., Vial, C., Valdebenito, P., Chaparro, E., Espinoza, K., & Repetto, G. (2015). MP68-16 Association of genetic variants with the occurance of bladder cancer in an arsenic-exposed population. The Journal of Urology, 193(4S), e863-e864. | Conference abstract |
| Fu, S., Wu, J., Li, Y., Liu, Y., Gao, Y., Yao, F., ... & Sun, D. (2014). Urinary arsenic metabolism in a Western Chinese population exposed to high-dose inorganic arsenic in drinking water: Influence of ethnicity and genetic polymorphisms. Toxicology and applied pharmacology, 274(1), 117-123. | Arsenic metabolism |
| Fujihara, J., Yasuda, T., Iwata, H., Tanabe, S., & Takeshita, H. (2016). Association of XRCC1 polymorphisms with arsenic methylation. Archives of toxicology, 90, 1009-1012. | Arsenic metabolism |
| Galvez-Fernandez, M., Sanchez-Saez, F., Domingo-Relloso, A., Rodriguez-Hernandez, Z., Tarazona, S., Gonzalez-Marrachelli, V., ... & Monleon, D. (2022). Gene-environment interaction analysis of redox-related metals and genetic variants with plasma metabolic patterns in a general population from Spain: The Hortega Study. Redox Biology, 52, 102314. | No arsenic metabolism, or arsenic-related disease |
| Gamboa-Loira, B., Hernández-Alcaraz, C., Gandolfi, A. J., Cebrián, M. E., Burguete-García, A., García-Martínez, A., & López-Carrillo, L. (2018). Arsenic methylation capacity in relation to nutrient intake and genetic polymorphisms in one-carbon metabolism. Environmental research, 164, 18-23. | Arsenic metabolism |
| Gamboa-Loira, B., Mérida-Ortega, Á., Rothenberg, S. J., Cebrián, M. E., & López-Carrillo, L. (2022). Metal exposure and breast cancer among Northern Mexican women: assessment of genetic susceptibility. Environmental Science and Pollution Research, 29(59), 89002-89013. | Breast cancer |
| Gao, J., Tong, L., Argos, M., Bryan, M. S., Ahmed, A., Rakibuz-Zaman, M., ... & Pierce, B. L. (2015). The genetic architecture of arsenic metabolism efficiency: a SNP-based heritability study of Bangladeshi adults. Environmental health perspectives, 123(10), 985-992. | Arsenic metabolism |
| Gao, S., Mostofa, M. G., Quamruzzaman, Q., Rahman, M., Rahman, M., Su, L., ... & Christiani, D. C. (2019). Gene-environment interaction and maternal arsenic methylation efficiency during pregnancy. Environment international, 125, 43-50. | Duplicate |
| Gao, S., Mostofa, M. G., Quamruzzaman, Q., Rahman, M., Rahman, M., Su, L., ... & Christiani, D. C. (2019). Gene-environment interaction and maternal arsenic methylation efficiency during pregnancy. Environment international, 125, 43-50. | Arsenic metabolism |
| Gardner, R. M., Engström, K., Bottai, M., Hoque, W. A., Raqib, R., Broberg, K., & Vahter, M. (2012). Pregnancy and the methyltransferase genotype independently influence the arsenic methylation phenotype. Pharmacogenetics and genomics, 22(7), 508-516. | No genetic susceptibility, or not SNP |
| Gasmi, A., Menzel, A., Piscopo, S., & Noor, S. (2022). Toxic Metals Exposure and APOE4 Gene Variant in Cognitive Decline Disorders. Archives of Razi Institute, 77(1), 1. | Secondary study design (e.g., review, meta-analysis) |
| Gauer, B., Sauer, E., Nascimento, S., Göethel, G., Peruzzi, C., Flesch, I., ... & Garcia, S. C. (2021). Cellular response to chemicals present in air pollution in occupationally exposed workers and its potential cancer susceptibility. Chemosphere, 263, 127857. | No genetic susceptibility, or not SNP |
| Ghosh, P., Basu, A., Mahata, J., Basu, S., Sengupta, M., Das, J. K., ... & Giri, A. K. (2006). Cytogenetic damage and genetic variants in the individuals susceptible to arsenic‐induced cancer through drinking water. International journal of cancer, 118(10), 2470-2478. | Skin lesions |
| Gong, G., & O'Bryant, S. E. (2012). Low-level arsenic exposure, AS3MT gene polymorphism and cardiovascular diseases in rural Texas counties. Environmental research, 113, 52-57. | No arsenic metabolism, or arsenic-related disease |
| González-Martínez, F., Sánchez-Rodas, D., Cáceres, D. D., Martínez, M. F., Quiñones, L. A., & Johnson-Restrepo, B. (2018). Arsenic exposure, profiles of urinary arsenic species, and polymorphism effects of glutathione-s-transferase and metallothioneins. Chemosphere, 212, 927-936. | Arsenic metabolism |
| González-Martínez, F., Sánchez-Rodas, D., Varela, N. M., Sandoval, C. A., Quiñones, L. A., & Johnson-Restrepo, B. (2020). As3MT and GST polymorphisms influencing arsenic metabolism in human exposure to drinking groundwater. International Journal of Molecular Sciences, 21(14), 4832. | Arsenic metabolism |
| Granja, F., Morari, E. C., Assumpcao, L. V. M., & Ward, L. S. (2005). GSTO polymorphism analysis in thyroid nodules suggest that GSTO1 variants do not influence the risk for malignancy. European Journal of Cancer Prevention, 277-280. | No arsenic metabolism, or arsenic-related disease |
| Gribble, M. O., Voruganti, V. S., Cole, S. A., Haack, K., Balakrishnan, P., Laston, S. L., ... & Navas-Acien, A. (2015). Linkage analysis of urine arsenic species patterns in the strong heart family study. Toxicological Sciences, 148(1), 89-100. | Arsenic metabolism |
| Gribble, M. O., Voruganti, V. S., Cropp, C. D., Francesconi, K. A., Goessler, W., Umans, J. G., ... & Navas-Acien, A. (2013). SLCO1B1 variants and urine arsenic metabolites in the Strong Heart Family Study. toxicological sciences, 136(1), 19-25. | Arsenic metabolism |
| Harari, F., Engström, K., Concha, G., Colque, G., Vahter, M., & Broberg, K. (2013). N-6-adenine-specific DNA methyltransferase 1 (N6AMT1) polymorphisms and arsenic methylation in Andean women. Environmental Health Perspectives, 121(7), 797-803. | Arsenic metabolism |
| Hernández, A., Xamena, N., Sekaran, C., Tokunaga, H., Sampayo-Reyes, A., Quinteros, D., ... & Marcos, R. (2008). High arsenic metabolic efficiency in AS3MT287Thr allele carriers. Pharmacogenetics and genomics, 18(4), 349-355. | Arsenic metabolism |
| Hernández, A., Xamena, N., Surrallés, J., Sekaran, C., Tokunaga, H., Quinteros, D., ... & Marcos, R. (2008). Role of the Met287Thr polymorphism in the AS3MT gene on the metabolic arsenic profile. Mutation Research/Fundamental and Molecular Mechanisms of Mutagenesis, 637(1-2), 80-92. | Arsenic metabolism |
| Hou, W-S., Zhang, L-F, Pei, Q-L. (2013). Relationship between arsenic (+ 3 oxidation state) methyltransferase genetic polymorphisms and susceptibility to endemic arsenism. Chinese Journal of Endemiology, 33-37. | Skin lesions |
| Hsieh, R. L., Su, C. T., Shiue, H. S., Chen, W. J., Huang, S. R., Lin, Y. C., ... & Hsueh, Y. M. (2017). Relation of polymorphism of arsenic metabolism genes to arsenic methylation capacity and developmental delay in preschool children in Taiwan. Toxicology and applied pharmacology, 321, 37-47. | Arsenic metabolism, developmental delay |
| Hsu, L. I., Chen, W. P., Yang, T. Y., Chen, Y. H., Lo, W. C., Wang, Y. H., ... & Chen, C. J. (2011). Genetic polymorphisms in glutathione S-transferase (GST) superfamily and risk of arsenic-induced urothelial carcinoma in residents of southwestern Taiwan. Journal of biomedical science, 18(1), 1-11. | Urothelial carcinoma |
| Hsu, L. I., Chiu, A. W., Huan, S. K., Chen, C. L., Wang, Y. H., Hsieh, F. I., ... & Chen, C. J. (2008). SNPs of GSTM1, T1, P1, epoxide hydrolase and DNA repair enzyme XRCC1 and risk of urinary transitional cell carcinoma in southwestern Taiwan. Toxicology and applied pharmacology, 228(2), 144-155. | Urinary transitional cell carcinoma |
| Hsu, L. I., Wu, M. M., Wang, Y. H., Lee, C. Y., Yang, T. Y., Hsiao, B. Y., & Chen, C. J. (2015). Association of environmental arsenic exposure, genetic polymorphisms of susceptible genes, and skin cancers in Taiwan. BioMed research international, 2015. | No arsenic metabolism, or arsenic-related disease |
| Hsueh, Y. M. H., Chen, W. J., & Ao, P. L. (2017, January). The association between coffee, arsenic, lead, cadmium and polymorphisms of PON1 and PPAR-G and chronic kidney disease. In Annals of Nutrition and Metabolism (Vol. 71, pp. 658-658). | Conference abstract |
| Hsueh, Y. M., Chen, W. J., Chung, C. J., Hsieh, R. L., Chen, H. H., Huang, Y. L., ... & Lin, Y. C. (2022). The combined effects of nucleotide-binding domain-like receptor protein 3 polymorphisms and levels of blood lead on developmental delays in preschool children. Journal of Hazardous Materials, 424, 127317. | Developmental delay |
| Hsueh, Y. M., Chen, W. J., Lin, Y. C., Huang, C. Y., Shiue, H. S., Yang, S. M., ... & Su, C. T. (2018). Adiponectin gene polymorphisms and obesity increase the susceptibility to arsenic-related renal cell carcinoma. Toxicology and applied pharmacology, 350, 11-20. | Renal cell carcinoma |
| Hsueh, Y. M., Chen, W. J., Lin, Y. C., Huang, Y. L., Shiue, H. S., Lin, Y. F., ... & Chen, H. H. (2022). Combined effects of nucleotide-binding domain-like receptor protein 3 polymorphisms and environmental metals exposure on chronic kidney disease. Scientific Reports, 12(1), 6307. | Upper urinary tract urothelial carcinoma, bladder cancer |
| Hsueh, Y. M., Lin, Y. C., Chen, W. J., Huang, C. Y., Shiue, H. S., Pu, Y. S., ... & Su, C. T. (2018). Corrigendum to The polymorphism XRCC1 Arg194Trp and 8-hydroxydeoxyguanosine increased susceptibility to arsenic-related renal cell carcinoma. Toxicology and Applied Pharmacology 332 (2017) 1-7. Toxicology and applied pharmacology, 356, 139. | Renal cell carcinoma |
| Hsueh, Y. M., Lin, Y. C., Chung, C. J., Huang, Y. L., Hsieh, R. L., Huang, P. T., ... & Su, C. T. (2020). Combined effect of polymorphisms of MTHFR and MTR and arsenic methylation capacity on developmental delay in preschool children in Taiwan. Archives of toxicology, 94, 2027-2038. | Developmental delay |
| Huang, C. Y., Lin, Y. C., Shiue, H. S., Chen, W. J., Su, C. T., Pu, Y. S., ... & Hsueh, Y. M. (2018). Comparison of arsenic methylation capacity and polymorphisms of arsenic methylation genes between bladder cancer and upper tract urothelial carcinoma. Toxicology letters, 295, 64-73. | Arsenic metabolism, bladder cancer, upper tract urothelial carcinoma |
| Huang, C. Y., Pu, Y. S., Shiue, H. S., Chen, W. J., Lin, Y. C., & Hsueh, Y. M. (2016). Polymorphisms of human 8-oxoguanine DNA glycosylase 1 and 8-hydroxydeoxyguanosine increase susceptibility to arsenic methylation capacity-related urothelial carcinoma. Archives of toxicology, 90, 1917-1927. | Urothelial carcinoma |
| Huang, C. Y., Su, C. T., Chu, J. S., Huang, S. P., Pu, Y. S., Yang, H. Y., ... & Hsueh, Y. M. (2011). The polymorphisms of P53 codon 72 and MDM2 SNP309 and renal cell carcinoma risk in a low arsenic exposure area. Toxicology and applied pharmacology, 257(3), 349-355. | Renal cell carcinoma |
| Huang, S. K., Chiu, A. W. H., Pu, Y. S., Huang, Y. K., Chung, C. J., Tsai, H. J., ... & Hsueh, Y. M. (2009). Arsenic methylation capability, myeloperoxidase and sulfotransferase genetic polymorphisms, and the stage and grade of urothelial carcinoma. Urologia Internationalis, 82(2), 227-234. | Arsenic metabolism |
| Hwang, Y. H., Chen, Y. H., Su, Y. N., Hsu, C. C., Chen, Y. H., & Yuan, T. H. (2010). Genetic polymorphism of As3MT and delayed urinary DMA excretion after organic arsenic intake from oyster ingestion. Journal of Environmental Monitoring, 12(6), 1247-1254. | Arsenic metabolism |
| Jaiswal, A., Satardey, R., Datta, C., Panda, C., & Pal, D. K. (2021). Association of BRCA1 and BRCA2 genes in arsenic-induced urinary bladder carcinoma. Journal of Clinical Urology, 20514158211051888. | Urinary bladder carcinoma |
| Janasik, B., Reszka, E., Stanislawska, M., Wieczorek, E., Fendler, W., & Wasowicz, W. (2015). Biological monitoring and the influence of genetic polymorphism of As3MT and GSTs on distribution of urinary arsenic species in occupational exposure workers. International Archives of Occupational and Environmental Health, 88, 807-818. | Arsenic metabolism |
| Jiang, J., He, S., Liu, K., Yu, K., Long, P., Xiao, Y., ... & Yuan, Y. (2022). Multiple plasma metals, genetic risk and serum complement C3, C4: A gene-metal interaction study. Chemosphere, 291, 132801. | Duplicate |
| Jin, B., Wan, S., Boah, M., Yang, J., Ma, W., Lv, M., ... & Wang, K. (2021). GSTM1 and GSTT1 null genotype polymorphisms and susceptibility to arsenic poisoning: a meta-analysis. Biological Trace Element Research, 199, 2085-2095. | Secondary study design (e.g., review, meta-analysis) |
| Kadioglu, E., Hisarli, N. D., Asik, E., Demircigil, G. C., Alshana, U., Ertas, N., ... & Burgaz, S. (2012). AS3MT gene polymorphism in residents exposed to inorganic arsenic via drinking water. Toxicology Letters, 211, 9. | Conference abstract |
| Karagas, M. R., Andrew, A. S., Nelson, H. H., Li, Z., Punshon, T., Schned, A., ... & Kelsey, K. T. (2012). SLC39A2 and FSIP1 polymorphisms as potential modifiers of arsenic-related bladder cancer. Human genetics, 131, 453-461. | Bladder cancer |
| Karagas, M., Andrew, A., Nelson, H., Schned, A., Marsit, C., Morris, J. S., ... & Kelsey, K. (2011). Novel Single Nucleotide Polymorphisms Related to Arsenic-associated Bladder Cancer in a US Population-based Study. Epidemiology, 22(1), S71. | Conference abstract |
| Kaya-Akyüzlü, D., Kayaaltı, Z., & Söylemezoğlu, T. (2015). Does MRP2 G4544A and GSTP1 Ile105Val polymorphisms have an effect on urinary and blood arsenic levels?. Toxicology Letters, 2(238), S227. | Conference abstract |
| Kaya-Akyüzlü, D., Kayaaltı, Z., & Söylemezoğlu, T. (2016). Influence of MRP1 G1666A and GSTP1 Ile105Val genetic variants on the urinary and blood arsenic levels of Turkish smelter workers. Environmental toxicology and pharmacology, 43, 68-73. | Arsenic metabolism |
| Kayaalti, Z., Akyuzlu, D. K., Türksoy, V. A., Soylemez, E., & Soylemezoglu, T. (2014). Does divalent metal transporter 1 mediate the intestinal absorption of arsenic?. Abstracts/Toxicology Letters 229S, 40, S252. | Conference abstract |
| Kibriya, M. G., Jasmine, F., Parvez, F., Argos, M., Roy, S., Paul-Brutus, R., ... & Ahsan, H. (2017). Association between genome-wide copy number variation and arsenic-induced skin lesions: a prospective study. Environmental Health, 16(1), 1-13. | Skin lesions |
| Kile, M. L., Houseman, E. A., Quamruzzaman, Q., Rahman, M., Mahiuddin, G., Mostofa, G., ... & Christiani, D. C. (2013). Influence of GSTT1 genetic polymorphisms on arsenic metabolism. Journal of the Indian Society of Agricultural Statistics. Indian Society of Agricultural Statistics, 67(2), 197. | Arsenic metabolism |
| Kile, M. L., Houseman, E. A., Rodrigues, E., Smith, T. J., Quamruzzaman, Q., Rahman, M., ... & Christiani, D. C. (2005). Toenail arsenic concentrations, GSTT1 gene polymorphisms, and arsenic exposure from drinking water. Cancer Epidemiology Biomarkers & Prevention, 14(10), 2419-2426. | No arsenic metabolism, or arsenic-related disease |
| Kubiś, J., Kmieć, M., Bińkowski, J., & Sróżyńska, M. (2020). The influence of high and low levels of arsenic in the human body on the process of carcinogenesis, based on function, expression and genetic polymorphisms in the genes encoding the two arsenic transporters-water channels AQP and glucose transporters glut (SLC2A). Genetika, 52(1), 379-392. | Unable to access full text |
| Kundu, M., Ghosh, P., Mitra, S., Das, J. K., Sau, T. J., Banerjee, S., ... & Giri, A. K. (2011). Precancerous and non-cancer disease endpoints of chronic arsenic exposure: the level of chromosomal damage and XRCC3 T241M polymorphism. Mutation Research/Fundamental and Molecular Mechanisms of Mutagenesis, 706(1-2), 7-12. | Skin lesions, peripheral neuropathy, conjunctivitis |
| Lesseur, C., Gilbert-Diamond, D., Andrew, A. S., Ekstrom, R. M., Li, Z., Kelsey, K. T., ... & Karagas, M. R. (2012). A case-control study of polymorphisms in xenobiotic and arsenic metabolism genes and arsenic-related bladder cancer in New Hampshire. Toxicology letters, 210(1), 100-106. | Bladder cancer |
| Li, J., Sun, C., Cai, W., Li, J., Rosen, B. P., & Chen, J. (2021). Insights into S-adenosyl-l-methionine (SAM)-dependent methyltransferase related diseases and genetic polymorphisms. Mutation Research/Reviews in Mutation Research, 788, 108396. | Secondary study design (e.g., review, meta-analysis) |
| Li, W. F., Sun, C. W., Chang, K. H., & Wang, S. L. (2006). Urinary arsenic profile in residents of blackfoot disease-endemic area in Taiwan: Role of GSTO1 and GSTO2 polymorphisms. Toxicology Letters, 164(1), S201. | Conference abstract |
| Li, W. F., Sun, C. W., Liao, Y. T., Chen, C. J., & Wang, S. L. (2009). Effects of human AS3MT genetic polymorphisms on arsenic metabolism in Taiwanese. Toxicology Letters, (189), S223. | Conference abstract |
| Liang, B., Zhang, A-H., Dong, X-X. (2012). Relationship between glutathione S-transferase GSTO 1 Glu155△ Glu genetic polymorphism and arsenic poisoning caused by coal-burning. Chinese Journal of Endemiology, 20-23. | Unable to access full text |
| Liang, B., Zhang, A-H., Xi, X-G., Zhang, B-X., Huang, X-X. (2009). Relationship between myeloperoxidase and catalase genetic polymorphism and their activities with arsenic poisoning caused by coal-burning. Chinese Journal of Endemiology, 272-275. | Skin lesions |
| Liang, B., Zhang, A.-H., Xi, X.-G., Huang, X.-X., Liang, B., Zhang, A.-H., Xi, X.-G., (2007). Relationship between genetic polymorphisms in glutathione S-transferase M1, T1 and arsenic poisoning caused by coal-burning. Chinese Journal of Endemiology, 26(1), 6-8 | Unable to access full text |
| Liao, P. J., Hsu, K. H., Chiou, H. Y., Chen, C. J., & Lee, C. H. (2021). Joint effects of genomic markers and urinary methylation capacity associated with inorganic arsenic metabolism on the occurrence of cancers among residents in arseniasis-endemic areas: A cohort subset with average fifteen-year follow-up. biomedical journal, 44(6), S218-S225. | Cancer |
| Lin, G. F., Du, H., Chen, J. G., Lu, H. C., Guo, W. C., Golka, K., & Shen, J. H. (2010). Association of XPD/ERCC2 G 23591 A and A 35931 C polymorphisms with skin lesion prevalence in a multiethnic, arseniasis-hyperendemic village exposed to indoor combustion of high arsenic coal. Archives of toxicology, 84, 17-24. | Duplicate |
| Lin, G. F., Du, H., Chen, J. G., Lu, H. C., Guo, W. C., Golka, K., & Shen, J. H. (2010). Association of XPD/ERCC2 G 23591 A and A 35931 C polymorphisms with skin lesion prevalence in a multiethnic, arseniasis-hyperendemic village exposed to indoor combustion of high arsenic coal. Archives of toxicology, 84, 17-24. | Skin lesions |
| Lin, G. F., Du, H., Chen, J. G., Lu, H. C., Guo, W. C., Meng, H., ... & Shen, J. H. (2006). Arsenic-related skin lesions and glutathione S-transferase P1 A1578G (Ile105Val) polymorphism in two ethnic clans exposed to indoor combustion of high arsenic coal in one village. Pharmacogenetics and genomics, 16(12), 863-871. | Skin lesions |
| Lin, G. F., Du, H., Chen, J. G., Lu, H. C., Kai, J. X., Zhou, Y. S., ... & Shen, J. H. (2007). Glutathione S-transferases M1 and T1 polymorphisms and arsenic content in hair and urine in two ethnic clans exposed to indoor combustion of high arsenic coal in Southwest Guizhou, China. Archives of toxicology, 81, 545-551. | No arsenic metabolism, or arsenic-related disease |
| Lin, W. Y., Pan, S. C., Yang, Y. C., Sheu, H. M., Chao, S. C., Chao, C. K., ... & Guo, H. R. (2011). Arsenic Ingestion, Polo-like Kinase 2 Gene Polymorphism, and Skin Cancer. Epidemiology, 22(1), S136. | Conference abstract |
| Lin, Y. C., Chen, W. J., Huang, C. Y., Shiue, H. S., Su, C. T., Ao, P. L., ... & Hsueh, Y. M. (2018). Corrigendum to “Polymorphisms of Arsenic (+ 3 Oxidation State) Methyltransferase and Arsenic Methylation Capacity Affect the Risk of Bladder Cancer”. Toxicological Sciences, 164(2), 644-644. | Arsenic metabolism, bladder cancer |
| Lin, Y. C., Huang, Y. L., Shiue, H. S., Hsu, S. L., & Hsueh, Y. M. (2023). Chronic Kidney Disease: Combined Effects of Gene Polymorphisms of Tissue Inhibitors of Metalloproteinase 3, Total Urinary Arsenic, and Blood Lead Concentration. International journal of environmental research and public health, 20(3), 1886. | Chronic kidney disease |
| Lindberg, A. L., Ekström, E. C., Nermell, B., Rahman, M., Lönnerdal, B., Persson, L. Å., & Vahter, M. (2008). Gender and age differences in the metabolism of inorganic arsenic in a highly exposed population in Bangladesh. Environmental research, 106(1), 110-120. | No genetic susceptibility, or not SNP |
| Lindberg, A. L., Kumar, R., Goessler, W., Thirumaran, R., Gurzau, E., Koppova, K., ... & Vahter, M. (2007). Metabolism of low-dose inorganic arsenic in a central European population: influence of sex and genetic polymorphisms. Environmental health perspectives, 115(7), 1081-1086. | Arsenic metabolism |
| Lindberg, A. L., Kumar, R., Goessler, W., Thirumaran, R., Gurzau, E., Koppova, K., ... & Vahter, M. (2007). Metabolism of low-dose inorganic arsenic in a central European population: influence of sex and genetic polymorphisms. Environmental health perspectives, 115(7), 1081-1086. | Arsenic metabolism |
| Liu, W. S., Wang, X. Y., Lu, J., Zhang, Y. M., Ye, X. M., Li, J. M., ... & Hai, X. (2020). Polymorphisms in arsenic (+ 3 oxidation state) methyltransferase (AS3MT) predict the occurrence of hyperleukocytosis and arsenic metabolism in APL patients treated with As 2 O 3. Archives of toxicology, 94, 1203-1213. | Arsenic metabolism, urothelial carcinoma |
| Long, P., Wang, H., Zhang, Z., Li, W., Zhang, Y., He, S., ... & Yuan, Y. (2022). Plasma metal concentrations and their interactions with genetic susceptibility on homocysteine levels. Ecotoxicology and Environmental Safety, 241, 113705. | No arsenic metabolism, or arsenic-related disease |
| Lu, J., Yu, K., Fan, S., Liu, W., Dong, Z., Li, J., ... & Zhou, J. (2019). Influence of AS3MT polymorphisms on arsenic metabolism and liver injury in APL patients treated with arsenic trioxide. Toxicology and Applied Pharmacology, 379, 114687. | Not environmental arsenic exposure |
| Luo, L., Li, Y., Gao, Y., Zhao, L., Feng, H., Wei, W., ... & Sun, D. (2018). Association between arsenic metabolism gene polymorphisms and arsenic-induced skin lesions in individuals exposed to high-dose inorganic arsenic in northwest China. Scientific Reports, 8(1), 413. | Skin lesions |
| Luo, R., Zhang, L., Jiang, Z., Chen, L., Zhu, N., Hou, Y., ... & Ji, Y. (2019). Genomic alteration, tumor mutation burden and PD-L1 status of Chinese hepatic angiosarcoma patients. Cancer Research, 79(13_Supplement), 742-742. | Conference abstract |
| Ma, L., Liang, B., Yang, Y., Chen, L., Liu, Q., & Zhang, A. (2020). hOGG1 promoter methylation, hOGG1 genetic variants and their interactions for risk of coal-borne arsenicosis: A case-control study. Environmental Toxicology and Pharmacology, 75, 103330. | Skin lesions |
| Majumder, M., Dasgupta, U. B., Guha Mazumder, D. N., & Das, N. (2017). Skin score correlates with global DNA methylation and GSTO1 A140D polymorphism in arsenic-affected population of Eastern India. Toxicology Mechanisms and Methods, 27(6), 467-475. | No genetic susceptibility, or not SNP |
| Marciniak, W., Matoušek, T., Domchek, S., Paradiso, A., Patruno, M., Irmejs, A., ... & Lubiński, J. (2021). Blood Arsenic Levels as a Marker of Breast Cancer Risk among BRCA1 Carriers. Cancers, 13(13), 3345. | No genetic susceptibility, or not SNP |
| Marcos, R., Martínez, V., Hernández, A., Creus, A., Sekaran, C., Tokunaga, H., & Quinteros, D. (2006). Metabolic profile in workers occupationally exposed to arsenic: role of GST polymorphisms. Journal of occupational and environmental medicine, 334-341. | Arsenic metabolism |
| Marnell, L. L., Garcia-Vargas, G. G., Chowdhury, U. K., Zakharyan, R. A., Walsh, B., Avram, M. D., ... & Aposhian, H. V. (2003). Polymorphisms in the human monomethylarsonic acid (MMAV) reductase/hGSTO1 gene and changes in urinary arsenic profiles. Chemical research in toxicology, 16(12), 1507-1513. | Arsenic metabolism |
| Mazumdar, M., Valeri, L., Rodrigues, E. G., Ibne Hasan, M. O. S., Hamid, R., Paul, L., ... & Christiani, D. C. (2015). Polymorphisms in maternal folate pathway genes interact with arsenic in drinking water to influence risk of myelomeningocele. Birth Defects Research Part A: Clinical and Molecular Teratology, 103(9), 754-762. | Myelomeningocele |
| McCarty, K. M., Chen, Y. C., Quamruzzaman, Q., Rahman, M., Mahiuddin, G., Hsueh, Y. M., ... & Christiani, D. C. (2007). Arsenic methylation, GSTT1, GSTM1, GSTP1 polymorphisms, and skin lesions. Environmental Health Perspectives, 115(3), 341-345. | Skin lesions, arsenic metabolism |
| McCarty, K. M., Ryan, L., Houseman, E. A., Williams, P. L., Miller, D. P., Quamruzzaman, Q., ... & Christiani, D. C. (2007). A case-control study of GST polymorphisms and arsenic related skin lesions. Environmental Health, 6(1), 1-10. | Skin lesions |
| McCarty, K. M., Smith, T. J., Zhou, W., Gonzalez, E., Quamruzzaman, Q., Rahman, M., ... & Christiani, D. C. (2007). Polymorphisms in XPD (Asp312Asn and Lys751Gln) genes, sunburn and arsenic-related skin lesions. Carcinogenesis, 28(8), 1697-1702. | Skin lesions |
| Mendelian randomization of inorganic arsenic metabolism as a risk factor for hypertension- And diabetes-related traits among adults in the Hispanic Community Health Study/Study of Latinos (HCHS/SOL) cohort | No genetic suspectibility, or not SNP |
| Meza, M. M., Yu, L., Rodriguez, Y. Y., Guild, M., Thompson, D., Gandolfi, A. J., & Klimecki, W. T. (2005). Developmentally restricted genetic determinants of human arsenic metabolism: association between urinary methylated arsenic and CYT19 polymorphisms in children. Environmental health perspectives, 113(6), 775-781. | Arsenic metabolism |
| Meza, M., Gandolfi, A. J., & Klimecki, W. T. (2007). Developmental and genetic modulation of arsenic biotransformation: a gene by environment interaction?. Toxicology and applied pharmacology, 222(3), 381-387. | Arsenic metabolism |
| Michel‐Ramirez, G., Recio‐Vega, R., Lantz, R. C., Gandolfi, A. J., Olivas‐Calderon, E., Chau, B. T., & Amistadi, M. K. (2020). Assessment of YAP gene polymorphisms and arsenic interaction in Mexican women with breast cancer. Journal of Applied Toxicology, 40(3), 342-351. | Duplicate |
| Michel‐Ramirez, G., Recio‐Vega, R., Lantz, R. C., Gandolfi, A. J., Olivas‐Calderon, E., Chau, B. T., & Amistadi, M. K. (2020). Assessment of YAP gene polymorphisms and arsenic interaction in Mexican women with breast cancer. Journal of Applied Toxicology, 40(3), 342-351. | Breast cancer |
| Mohd Noor, F. A., Elias, S. M., Bakar, S. A., Aris, A. Z., & Zulkifli, H. M. (2022). Blood Heavy Metals (Arsenic, Cadmium and Lead) Concentration and Genetic Polymorphism of Glutathione S-transferase Genes Among Adults in Coastal Area of Melaka, Malaysia. Malaysian Journal of Medicine & Health Sciences, 18. | No arsenic metabolism, or arsenic-related disease |
| Montero-Delgado, R. I., López-González, M., Noris, G., Santana, C., Burguete-Argueta, N. A., & Gomez, R. (2020, December). Arsenic efficient metabolism in Mexican Indigenous reinforces the arsenical hypothesis. In European Journal of Human Genetics (Vol. 28, No. SUPPL 1, pp. 702-702). | Conference abstract |
| Ni, G., Tan, J., Wang, M., Ping, N., Liu, M., & He, Y. (2021). Polymorphisms of the AS3MT gene are associated with arsenic methylation capacity and damage to the P21 gene in arsenic trioxide plant workers. Toxicology and Industrial Health, 37(12), 727-736. | Not environmental arsenic exposure |
| Niedzwiecki, M. M., Liu, X., Zhu, H., Hall, M. N., Slavkovich, V., Ilievski, V., ... & Gamble, M. V. (2018). Serum homocysteine, arsenic methylation, and arsenic-induced skin lesion incidence in Bangladesh: a one-carbon metabolism candidate gene study. Environment international, 113, 133-142. | Skin lesions, arsenic metabolism |
| Nriagu, J., Lin, T. S., Mazumder, D. G., & Chatterjee, D. (2012). E-cadherin polymorphisms and susceptibility to arsenic-related skin lesions in West Bengal, India. Science of the total environment, 420, 65-72. | Skin lesions |
| Nyam, G. (2021) An Association Study of Genetic Polymorphisms of PPAR Delta and Cardiovascular Diseases in an Arseniasis-endemic Area in Taiwan. Taipei Medical University | Master's thesis |
| Olmos, V., Astolfo, M. A., Sassone, A. H., & Lepori, E. C. V. (2021). The level of exposure affects the arsenic urinary methylation profile of a population of children. Journal of Hazardous Materials, 415, 125623. | Arsenic metabolism |
| Olmos, V., Navoni, J. A., Calcagno, M. L., Sassone, A. H., & Lepori, E. V. (2015). Influence of the level of arsenic (As) exposure and the presence of T860C polymorphism in human As urinary metabolic profile. Human & Experimental Toxicology, 34(2), 170-178. | Arsenic metabolism |
| Özdemir, F., Kayaaltı, Z., Kaya-Akyüzlü, D., Tutkun, E., & Söylemezoğlu, T. (2015). Effect of Glut1 A2841T polymorphism on urinary arsenic levels of individuals exposed to arsenic occupationally. Toxicology Letters, 238(2), S362-S363. | Conference abstract |
| Paiva, L., Hernández, A., Martínez, V., Creus, A., Quinteros, D., & Marcos, R. (2010). Association between GSTO2 polymorphism and the urinary arsenic profile in copper industry workers. Environmental research, 110(5), 463-468. | Arsenic metabolism |
| Paiva, L., Marcos, R., Creus, A., Coggan, M., Oakley, A. J., & Board, P. G. (2008). Polymorphism of glutathione transferase Omega 1 in a population exposed to a high environmental arsenic burden. Pharmacogenetics and genomics, 18(1), 1-10. | Arsenic metabolism |
| Palir, N., Stajnko, A., Tratnik, J. S., Mazej, D., Briški, A. S., France-Štiglic, A., ... & Falnoga, I. (2023). ALAD and APOE polymorphisms are associated with lead and mercury levels in Italian pregnant women and their newborns with adequate nutritional status of zinc and selenium. Environmental Research, 220, 115226. | No arsenic metabolism, or arsenic-related disease |
| Pierce, B. L., Kibriya, M. G., Lin, T., Jasmine, F., Argos, M., HEALS and BEST study investigators, & Ahsan, H. (2012). Genome-wide association study identifies 10q24. 32 variants associated with arsenic metabolism and premalignant skin lesion risk in Bangladesh. Cancer Research, 72(8_Supplement), 2925-2925. | Skin lesions, arsenic metabolism |
| Pierce, B. L., Kibriya, M. G., Tong, L., Jasmine, F., Argos, M., Roy, S., ... & Ahsan, H. (2012). Genome-wide association study identifies chromosome 10q24. 32 variants associated with arsenic metabolism and toxicity phenotypes in Bangladesh. PLoS genetics, 8(2), e1002522. | Duplicate |
| Pierce, B. L., Tong, L., Argos, M., Gao, J., Jasmine, F., Roy, S., ... & Ahsan, H. (2013). Arsenic metabolism efficiency has a causal role in arsenic toxicity: Mendelian randomization and gene-environment interaction. International journal of epidemiology, 42(6), 1862-1872. | Skin lesions, arsenic metabolism |
| Pierce, B. L., Tong, L., Dean, S., Argos, M., Jasmine, F., Rakibuz-Zaman, M., ... & Ahsan, H. (2019). A missense variant in FTCD is associated with arsenic metabolism and toxicity phenotypes in Bangladesh. PLoS genetics, 15(3), e1007984. | Duplicate |
| Pierce, B. L., Tong, L., Dean, S., Argos, M., Jasmine, F., Rakibuz-Zaman, M., ... & Ahsan, H. (2019). A missense variant in FTCD is associated with arsenic metabolism and toxicity phenotypes in Bangladesh. PLoS genetics, 15(3), e1007984. | Duplicate |
| Pierce, B. L., Tong, L., Dean, S., Argos, M., Jasmine, F., Rakibuz-Zaman, M., ... & Ahsan, H. (2019). Correction: A missense variant in FTCD is associated with arsenic metabolism and toxicity phenotypes in Bangladesh. PLoS genetics, 15(5), e1008172. | Duplicate |
| Pierce, B. L., Tong, L., Dean, S., Argos, M., Jasmine, F., Rakibuz-Zaman, M., ... & Ahsan, H. (2019). A missense variant in FTCD is associated with arsenic metabolism and toxicity phenotypes in Bangladesh. PLoS genetics, 15(3), e1007984. | Skin lesions, arsenic metabolism |
| Pineda-Belmontes, C. P., Hernández-Ramírez, R. U., Hernández-Alcaraz, C., Cebrián, M. E., & López-Carrillo, L. (2016). Genetic polymorphisms of PPAR gamma, arsenic methylation capacity and breast cancer risk in Mexican women. salud pública de méxico, 58, 220-227. | Breast cancer |
| Polimanti, R., Piacentini, S., De Angelis, F., De Stefano, G. F., & Fuciarelli, M. (2011). Human GST loci as markers of evolutionary forces: GSTO1* E155del and GSTO1* E208K polymorphisms may be under natural selection induced by environmental arsenic. Disease markers, 31(4), 231-239. | No arsenic metabolism, or arsenic-related disease |
| Porta, M., Pumarega, J., Amaral, A. F., Genkinger, J. M., Camargo, J., Mucci, L., ... & PANKRAS II Study Group. (2020). Influence of KRAS mutations, persistent organic pollutants, and trace elements on survival from pancreatic ductal adenocarcinoma. Environmental research, 190, 109781. | No arsenic metabolism, or arsenic-related disease |
| Porter, K. E., Basu, A., Hubbard, A. E., Bates, M. N., Kalman, D., Rey, O., ... & Skibola, C. F. (2010). Association of genetic variation in cystathionine-β-synthase and arsenic metabolism. Environmental research, 110(6), 580-587. | Arsenic metabolism |
| Pouladi, N., Sadi Khosroshahi, N., Valipour, M., & Abdolahi, S. (2021). p53 mutation possibility and food dietary containing heavy metals. Journal of Kerman University of Medical Sciences, 28(6), 626-636. | Secondary study design (e.g., review, meta-analysis) |
| Rahbar, M. H., Samms-Vaughan, M., Zhao, Y., Saroukhani, S., Zaman, S. F., Bressler, J., ... & Loveland, K. A. (2022). Additive and interactive associations of environmental and sociodemographic factors with the genotypes of three glutathione S-transferase genes in relation to the blood arsenic concentrations of children in Jamaica. International Journal of Environmental Research and Public Health, 19(1), 466. | No arsenic metabolism, or arsenic-related disease |
| Rangel-Moreno, K., Gamboa-Loira, B., López-Carrillo, L., & Cebrián, M. E. (2022). Prevalence of type 2 diabetes mellitus in relation to arsenic exposure and metabolism in Mexican women. Environmental Research, 210, 112948. | No genetic susceptibility, or not SNP |
| Recio‐Vega, R., González‐Cortes, T., Olivas‐Calderón, E., Clark Lantz, R., Jay Gandolfi, A., & Michel‐Ramirez, G. (2016). Association between polymorphisms in arsenic metabolism genes and urinary arsenic methylation profiles in girls and boys chronically exposed to arsenic. Environmental and molecular mutagenesis, 57(7), 516-525. | Arsenic metabolism |
| Recio‐Vega, R., Hernandez‐Gonzalez, S., Michel‐Ramirez, G., Olivas‐Calderón, E., Lantz, R. C., Gandolfi, A. J., & Amistadi, M. K. (2021). Association between the polymorphism of three genes involved in the methylation and efflux of arsenic (As3MT, MRP1, and P‐gp) with lung cancer in a Mexican cohort. Journal of Applied Toxicology, 41(9), 1357-1366. | Arsenic metabolism, lung cancer |
| Rehman, M. Y. A., Briedé, J. J., van Herwijnen, M., Krauskopf, J., Jennen, D. G., Malik, R. N., & Kleinjans, J. C. (2022). Integrating SNPs-based genetic risk factor with blood epigenomic response of differentially arsenic-exposed rural subjects reveals disease-associated signaling pathways. Environmental Pollution, 292, 118279. | No arsenic metabolism, or arsenic-related disease |
| Rehman, M. Y. A., van Herwijnen, M., Krauskopf, J., Farooqi, A., Kleinjans, J. C., Malik, R. N., & Briedé, J. J. (2020). Transcriptome responses in blood reveal distinct biological pathways associated with arsenic exposure through drinking water in rural settings of Punjab, Pakistan. Environment international, 135, 105403. | No arsenic metabolism, or arsenic-related disease |
| Rodrigues, E. G., Kile, M., Hoffman, E., Quamruzzaman, Q., Rahman, M., Mahiuddin, G., ... & Christiani, D. C. (2012). GSTO and AS3MT genetic polymorphisms and differences in urinary arsenic concentrations among residents in Bangladesh. Biomarkers, 17(3), 240-247. | Arsenic metabolism |
| Roy, S., Narzary, B., Ray, A., & Bordoloi, M. (2016). Arsenic-induced instrumental genes of apoptotic signal amplification in death-survival interplay. Cell Death Discovery, 2(1), 1-6. | Not human study (e.g., in vitro, in vivo, plants) |
| Rui, Z. H. A. N. G., Wen-sheng, H. O. U., Yan-fang, G. A. O., Lin-liang, S. U., Jiang, L. I. A. N. G., Yi, G. A. O., ... & Qiu-ling, P. E. I. (2009). Effect of multidrug resistance-associated proteins 1 and 2 gene mutations on phenotype of endemic arsenic poisoning. Chinese Journal of Endemiology, 14-19. | Unable to access full text |
| Safarzad, M., Besharat, S., Salimi, S., Azarhoush, R., Behnampour, N., & Joshaghani, H. R. (2019). Association between selenium, cadmium, and arsenic levels and genetic polymorphisms in DNA repair genes (XRCC5, XRCC6) in gastric cancerous and non-cancerous tissue. Journal of trace elements in medicine and biology, 55, 89-95. | No arsenic metabolism, or arsenic-related disease |
| Scannell Bryan, M., Sofer, T., Mossavar-Rahmani, Y., Thyagarajan, B., Zeng, D., Daviglus, M. L., & Argos, M. (2019). Mendelian randomization of inorganic arsenic metabolism as a risk factor for hypertension-and diabetes-related traits among adults in the Hispanic Community Health Study/Study of Latinos (HCHS/SOL) cohort. International journal of epidemiology, 48(3), 876-886. | No genetic suspectibility, or not SNP |
| Seow, W. J., Pan, W. C., Kile, M. L., Tong, L., Baccarelli, A. A., Quamruzzaman, Q., ... & Christiani, D. C. (2015). A distinct and replicable variant of the squamous cell carcinoma gene inositol polyphosphate‐5‐phosphatase modifies the susceptibility of arsenic‐associated skin lesions in Bangladesh. Cancer, 121(13), 2222-2229. | Skin lesions |
| Seow, W. J., Pan, W. C., Kile, M., Baccarelli, A. A., Quamruzzaman, Q., Rahman, M., ... & Christiani, D. C. (2013, August). Genetic Variants in One-carbon Metabolism and DNA Repair Genes Modify the Association between Arsenic and Skin Lesions in Bangladesh. In ISEE Conference Abstracts 25 (Vol. 2013, No. 1, p. 2951). | Conference abstract |
| Shaikhova, D. R., Amromina, A. M., Bereza, I. A., Shastin, A. S., Gazimova, V. G., Sutunkova, M. P., & Gurvich, V. B. (2022). Effects of genetic polymorphisms of GSTM1, GSTT1 and GSTP1 genes on blood metal levels in non-ferrous metal alloy smelter operators. Health, (3), 176. | No arsenic metabolism, or arsenic-related disease |
| Song, J., An, Z., Zhu, J., Li, J., Qu, R., Tian, G., ... & Wu, W. (2022). Subclinical cardiovascular outcomes of acute exposure to fine particulate matter and its constituents: A glutathione S-transferase polymorphism-based longitudinal study. Science of The Total Environment, 846, 157469. | No arsenic metabolism, or arsenic-related disease |
| Song, X., Li, Y., Stirling, E., Zhao, K., Wang, B., Zhu, Y., ... & Ma, B. (2022). Correction to: 'AsgeneDB: a curated orthology arsenic metabolism gene database and computational tool for metagenome annotation.' NAR Genomics and Bioinformatics, 4(4), lqac080. | Secondary study design (e.g., review, meta-analysis) |
| Stajnko, A., Šlejkovec, Z., Mazej, D., France-Štiglic, A., Briški, A. S., Prpić, I., ... & Falnoga, I. (2019). Arsenic metabolites; selenium; and AS3MT, MTHFR, AQP4, AQP9, SELENOP, INMT, and MT2A polymorphisms in Croatian-Slovenian population from PHIME-CROME study. Environmental research, 170, 301-319. | Arsenic metabolism |
| Stajnko, A., Tuhvatshin, R., Suranova, G., Mazej, D., Šlejkovec, Z., Falnoga, I., ... & Stegnar, P. (2020). Trace elements and ALAD gene polymorphisms in general population from three uranium legacy sites–A case study in Kyrgyzstan. Science of The Total Environment, 719, 134427. | No arsenic metabolism, or arsenic-related disease |
| Stea, F., Faita, F., Minichilli, F., Faita, F., Bustaffa, E., Cori, L., ... & Sicari, R. (2014, September). Effects of arsenic exposure and genetic polymorphisms in detoxification metabolism and DNA repair genes on subclinical atherosclerosis in high-exposed population of our country. In European Heart Journal (Vol. 35, pp. 561-562). | Conference abstract |
| Steinmaus, C., Moore, L. E., Shipp, M., Kalman, D., Rey, O. A., Biggs, M. L., ... & Smith, A. H. (2007). Genetic polymorphisms in MTHFR 677 and 1298, GSTM1 and T1, and metabolism of arsenic. Journal of Toxicology and Environmental Health, Part A, 70(2), 159-170. | Arsenic metabolism |
| Surdu, S., Fitzgerald, E. F., Bloom, M. S., Boscoe, F. P., Carpenter, D. O., Haase, R. F., ... & Fletcher, T. (2014). Polymorphisms in DNA repair genes XRCC1 and XRCC3, occupational exposure to arsenic and sunlight, and the risk of non-melanoma skin cancer in a European case-control study. Environmental research, 134, 382-389. | Basal cell carcinoma, squamous cell carcinoma |
| Szymańska-Chabowska, A., Matys, T., Łaczmański, Ł., Czerwińska, K., Janus, A., Smyk, B., ... & Gać, P. (2020). The relationship between PNP, GSTO-1, AS3MT and ADRB3 gene polymorphisms and urinary arsenic concentration among copper smelter and refinery employers. Human & Experimental Toxicology, 39(11), 1443-1453. | Not environmental arsenic exposure |
| Tamayo, L. I., Kumarasinghe, Y., Tong, L., Balac, O., Ahsan, H., Gamble, M., & Pierce, B. L. (2022). Inherited genetic effects on arsenic metabolism: A comparison of effects on arsenic species measured in urine and in blood. Environmental Epidemiology, 6(6). | Arsenic metabolism |
| Tamayo, L. I., Tong, L., Kibriya, M. G., Jasmine, F., Ahsan, H., & Pierce, B. L. (2022). Identifying inherited genetic variation that impacts individuals’ ability to metabolize arsenic and susceptibility to toxicity. Cancer Research, 82(12_Supplement), 1440-1440. | Conference abstract |
| TIMP3 Gene Polymorphisms of -1296 T > C and -915 A > G Increase the Susceptibility to Arsenic-Induced Skin Cancer: A Cohort Study and In Silico Analysis of Mutation Impacts | Skin cancer |
| Trdin, A., Tratnik, J. S., Stajnko, A., Marc, J., Mazej, D., Briški, A. S., ... & Falnoga, I. (2020). Trace elements and APOE polymorphisms in pregnant women and their new-borns. Environment international, 143, 105626. | No arsenic metabolism, or arsenic-related disease |
| Vahter, M. (2000). Genetic polymorphism in the biotransformation of inorganic arsenic and its role in toxicity. Toxicology letters, 112, 209-217. | Secondary study design (e.g., review, meta-analysis) |
| Valenzuela, O. L., Drobná, Z., Hernández-Castellanos, E., Sánchez-Peña, L. C., García-Vargas, G. G., Borja-Aburto, V. H., ... & Del Razo, L. M. (2009). Association of AS3MT polymorphisms and the risk of premalignant arsenic skin lesions. Toxicology and applied pharmacology, 239(2), 200-207. | Skin lesions, arsenic metabolism |
| Wang, S. L. (2012). S-051: Arsenic Exposure and Genetic Factors and Metabolic Syndrome in Two Populations from Taiwan. Epidemiology, 23(5S). | Conference abstract |
| Wang, Y. H., Yeh, S. D., Shen, K. H., Shen, C. H., Juang, G. D., Hsu, L. I., ... & Chen, C. J. (2009). A significantly joint effect between arsenic and occupational exposures and risk genotypes/diplotypes of CYP2E1, GSTO1 and GSTO2 on risk of urothelial carcinoma. Toxicology and applied pharmacology, 241(1), 111-118. | Urothelial carcinoma |
| Wang, Y. H., Yeh, S. D., Wu, M. M., Liu, C. T., Shen, C. H., Shen, K. H., ... & Chen, C. J. (2013). Comparing the joint effect of arsenic exposure, cigarette smoking and risk genotypes of vascular endothelial growth factor on upper urinary tract urothelial carcinoma and bladder cancer. Journal of hazardous materials, 262, 1139-1146. | Upper urinary tract urothelial carcinoma, bladder cancer |
| Wei, S-F., Zhang, A-H., Liang, B., Huang, X-X., (2011). Relationship between the genetic polymorphisms in nucleotide excision repair genes of ERCC1, XPD, XPC and the arsenism caused by coal-burning. Chinese Journal of Endemiology, 633-637. | Unable to access full text |
| Weiss, M. C., Shih, Y. H., Bryan, M. S., Jackson, B. P., Aguilar, D., Brown, E. L., ... & Sargis, R. M. (2023). Arsenic metabolism, diabetes prevalence, and insulin resistance among Mexican Americans: A mendelian randomization approach. Environmental Advances, 12, 100361. | Arsenic metabolism |
| Wu, C. C., Huang, Y. K., Chung, C. J., Huang, C. Y., Pu, Y. S., Shiue, H. S., ... & Hsueh, Y. M. (2013). Polymorphism of inflammatory genes and arsenic methylation capacity are associated with urothelial carcinoma. Toxicology and applied pharmacology, 272(1), 30-36. | Urothelial carcinoma |
| Wu, M. M., Chiou, H. Y., Chen, C. L., Hsu, L. I., Lien, L. M., Wang, C. H., ... & Chen, C. J. (2011). Association of heme oxygenase-1 GT-repeat polymorphism with blood pressure phenotypes and its relevance to future cardiovascular mortality risk: an observation based on arsenic-exposed individuals. Atherosclerosis, 219(2), 704-708. | No arsenic metabolism, or arsenic-related disease |
| Wu, M. M., Chiou, H. Y., Chen, C. L., Wang, Y. H., Hsieh, Y. C., Lien, L. M., ... & Chen, C. J. (2010). GT-repeat polymorphism in the heme oxygenase-1 gene promoter is associated with cardiovascular mortality risk in an arsenic-exposed population in northeastern Taiwan. Toxicology and applied pharmacology, 248(3), 226-233. | No genetic suspectibility, or not SNP |
| Wu, M. M., Chiou, H. Y., Lee, T. C., Chen, C. L., Hsu, L. I., Wang, Y. H., ... & Chen, C. J. (2010). GT-repeat polymorphism in the heme oxygenase-1 gene promoter and the risk of carotid atherosclerosis related to arsenic exposure. Journal of biomedical science, 17, 1-11. | No genetic suspectibility, or not SNP |
| Wu, M. M., Hsieh, F. I., Hsu, L. I., Lee, T. C., Chiou, H. Y., & Chen, C. J. (2021). Gt-repeat polymorphism in the ho-1 gene promoter is associated with risk of liver cancer: A follow-up study from arseniasis-endemic areas in taiwan. Journal of Clinical Medicine, 10(7), 1489. | No arsenic metabolism, or arsenic-related disease |
| Wu, M. M., Lee, C. H., Hsu, L. I., Cheng, W. F., Lee, T. C., Wang, Y. H., ... & Chen, C. J. (2016). Effect of heme oxygenase‐1 gene promoter polymorphism on cancer risk by histological subtype: A prospective study in arseniasis‐endemic areas in T aiwan. International Journal of Cancer, 138(8), 1875-1886. | Skin cancer |
| Xu, X., Drobná, Z., Voruganti, V. S., Barron, K., González-Horta, C., Sánchez-Ramírez, B., ... & Mendez, M. A. (2016). Association between variants in arsenic (+ 3 oxidation state) methyltranserase (AS3MT) and urinary metabolites of inorganic arsenic: Role of exposure level. Toxicological Sciences, 153(1), 112-123. | Arsenic metabolism |
| XU, X., Zhang, A., Liang, B., Han, X., Dong, X., & Huang, X. (2014). Relationship between genetic polymorphisms in nucleotide excision repair gene excision repair cross complement group 6, xeroderma pigmentosum group A and coal-burning-borne-arsenism. Chinese Journal of Endemiology, 15-20. | Unable to access full text |
| Xu, Y., Li, X., Zheng, Q., Wang, H., Wang, Y., & Sun, G. (2009). Lack of association of glutathione-S-transferase omega 1 (A140D) and omega 2 (N142D) gene polymorphisms with urinary arsenic profile and oxidative stress status in arsenic-exposed population. Mutation Research/Genetic Toxicology and Environmental Mutagenesis, 679(1-2), 44-49. | Arsenic metabolism |
| Yang, J., Yan, L., Zhang, M., Wang, Y., Wang, C., & Xiang, Q. (2015). Associations between the polymorphisms of GSTT1, GSTM1 and methylation of arsenic in the residents exposed to low-level arsenic in drinking water in China. Journal of human genetics, 60(7), 387-394. | Arsenic metabolism |
| Yang, S. M., Huang, C. Y., Shiue, H. S., Pu, Y. S., Hsieh, Y. H., Chen, W. J., ... & Hsueh, Y. M. (2016). Combined effects of DNA methyltransferase 1 and 3A polymorphisms and urinary total arsenic levels on the risk for clear cell renal cell carcinoma. Toxicology and applied pharmacology, 305, 103-110. | Clear cell renal cell carcinoma |
| Yuan, Y., Long, P., Liu, K., Xiao, Y., He, S., Li, J., ... & Wu, T. (2020). Multiple plasma metals, genetic risk and serum C-reactive protein: A metal-metal and gene-metal interaction study. Redox Biology, 29, 101404. | No arsenic metabolism, or arsenic-related disease |
| Zhao, F., Wang, N., Bao, F., Zhao, G., Jing, L., Wang, G., ... & Chen, B. (2022). Genome-wide association study reveals genetic basis of trace elements accumulation in maize kernels. Agriculture, 12(2), 262. | Not human study (e.g., in vitro, in vivo, plants) |
| Zhao, P., Liang, J. B., Deng, Z. Y., Wang, M. J., Qin, J. Y., Chen, C. J., & Hu, X. M. (2019). Association of gene mutations with response to arsenic-containing compound Qinghuang powder (复方青黄散) in patients with myelodysplastic syndromes. Chinese journal of integrative medicine, 25, 409-415. | Not environmental arsenic exposure |
| Zhao, Z., Gong, C., Gao, Y., Liu, X., Wu, S., Zhao, H., ... & He, Y. (2020). Association between single nucleotide polymorphisms in cardiovascular developmental critical genes and hypertension: a propensity score matching analysis. International Journal of Hypertension, 2020. | No arsenic metabolism, or arsenic-related disease |
| Ochoa-Martínez, Á. C., Araiza-Gamboa, Y., Varela-Silva, J. A., Orta-García, S. T., Carrizales-Yáñez, L., & Pérez-Maldonado, I. N. (2021). Effect of gene-environment interaction (arsenic exposure-PON1 Q192R polymorphism) on cardiovascular disease biomarkers in Mexican population. Environmental Toxicology and Pharmacology, 81, 103519. | No arsenic metabolism, or arsenic-related disease |
| Spratlen, M. J., Grau-Perez, M., Umans, J. G., Yracheta, J., Best, L. G., Francesconi, K., ... & Navas-Acien, A. (2018). Arsenic, one carbon metabolism and diabetes-related outcomes in the Strong Heart Family Study. Environment international, 121, 728-740. | No genetic susceptibility, arsenic metabolism |

**Supplement Table 5 Overview of the SNPs investigated in the included studies.**

| **Gene** | **Name** | **SNP (rsID)** | **Alleles** | **Consequence** | **Outcome** | **Reference** |
| --- | --- | --- | --- | --- | --- | --- |
| *ABCA1* | ATP Binding Cassette Subfamily A Member 1 | rs1800977 | G>A,C | 5 Prime UTR variant | T2DM | Grau-Perez et al. 2018 |
| rs2230806 | C>G,T | Missense variant |
| rs2230808 | T>A,C | Missense variant |
| rs2246293 | C>G,T | 5 Prime UTR variant |
| rs2422493 | G>A | 5 Prime UTR variant |
| *ACE* | Angiotensin I Converting Enzyme | rs4295 | C>G | Intron variant | T2DM | Grau-Perez et al. 2018 |
| rs4320 | G >A,T | Intron variant |
| rs4343 | G>A | Synonymous variant |
| rs4353 | A>G,T | Intron variant |
| rs4359 | T>A,C | Intron variant |
| rs4362 | T>A,C,G | Synonymous variant |
| rs4363 | G>A,C | Intron variant |
| *ADAMTS9* | ADAM Metallopeptidase with Thrombospondin Type 1 Motif 9 | rs17070905 | C>T | Missense variant | T2DM | Pan *et al.* 2013 |
| rs17070967 | T>C | Missense variant |
| rs6766801 | T>C | Non-coding transcript variant |
| *ADIPOQ* | Adiponectin | rs3774261 | A>G | Intron variant | T2DM | Grau-Perez et al. 2018 |
| *ADRB2* | Adrenoceptor Beta 2 | rs1042713 | G>A,C | Missense variant | T2DM | Grau-Perez et al. 2018 |
| rs12654778 | G>A,C | 5 Prime UTR variant |
| *AGT* | Angiotensinogen | rs2493132 | T>A,C,G | Intron variant | T2DM | Grau-Perez et al. 2018 |
| *AGTR1* | Angiotensin II Receptor Type 1 | rs12721241 | G>A | Intron variant | T2DM | Grau-Perez et al. 2018 |
| rs275649 | A>C,G,T | Intron variant |
| rs2933249 | G>A | Intron variant |
| rs5182 | C>G,T | Synonymous variant |
| rs5186 | A>C | 3 Prime UTR variant |
| rs909383 | C>T | Intron variant |
| *AGTRAP* | Type-1 angiotensin II receptor-associated protein | rs12095517 | T>C | Intron variant | T2DM | Grau-Perez et al. 2018 |
| rs4073575 | C>G,T | Intron variant |
| rs6540992 | T>A,C,G | Intron variant |
| rs6677313 | C>G | Intron variant |
| *APOA5* | Apolipoprotein A5 | rs10750097 | G>A,C | 5 Prime UTR variant | DM | Grau-Perez et al. 2018 |
| rs619054 | G>A | 3 Prime UTR variant |
| *APOE* | Apolipoprotein E | rs1081101 | C>T | 2KB Upstream variant | CVD  CIMT | Wu *et al.* 2015  Wu *et al.* 2014 |
| rs12982192 | T>C | Intron variant |
| rs405509 | T>G | 2KB Upstream variant |
| rs429358 | T>C | Missense variant | SBP | Farzan *et al.* 2016 |
| BP |
| CVD  CIMT | Wu *et al.* 2015  Wu *et al.* 2014 |
| rs434132 | C>G,T | 2KB Upstream variant |
| rs435380 | G>A | 2KB Upstream variant |
| rs446037 | G>T | 2KB Upstream variant |
| rs7256173 | C>T | 2KB Upstream variant |
| rs7259620 | G>A,C | 2KB Upstream variant |
| rs769445 | C>T | 2KB Upstream variant |
| rs769451 | T>G | Intron variant |
| rs769452 | T>A,C | Missense variant |
| rs877973 | C>A,T | Intron variant |
| rs429358 | T>C | Missense variant | IMT | Hiseh et al. 2008 |
| rs7412 | C>T | Missense variant |  |  |
| *AS3MT* | Arsenite methyl transferase | rs1046778 | T>C | 3 Prime UTR variant | CVD  CIMT | Wu *et al.* 2015  Wu *et al.* 2014 |
| GDM | Liang *et al.* 2023 |
| rs10509760 | A>G | Intron variant | CVD  CIMT | Wu *et al.* 2015  Wu *et al.* 2014 |
| rs10509761 | T>C | Intron variant | BP | Farzan *et al.* 2016 |
| CVD  CIMT | Wu *et al.* 2015  Wu *et al.* 2014 |
| rs10748835 | G>A | Intron variant | DM | Drobná *et al.* 2012 |
| CVD  CIMT | Wu *et al.* 2015  Wu *et al.* 2014 |
| rs10748839 | T>A | 2KB Upstream variant |
| rs10786719 | A>G,T | Intron variant |
| rs10883790 | A>C | Intron variant |
| rs10883795 | T>C,G | Intron variant |
| rs11191438 | G>A,C | Intron variant |
| rs11191439 | T>A,C | Missense variant | CA | Hsieh *et al.* 2011 |
| MetS | Chen *et al.* 2012 |
| DM | Drobná *et al.* 2012 |
| ECG abnor | Liao *et al.* 2009 |
| CVD  CIMT | Wu *et al.* 2015  Wu *et al.* 2014 |
| rs11191442 | T>A | Intron variant | CVD  CIMT | Wu *et al.* 2015  Wu *et al.* 2014 |
| rs11191453 | T>C | Intron variant | GDM | Liang *et al.* 2023 |
| rs11191454 | A>G | Intron variant | CVD  CIMT | Wu *et al.* 2015  Wu *et al.* 2014 |
| rs11191527 | C>G,T | Intron variant |
| rs11191659 | C>T | Intron variant |
| rs12573221 | A>C | 3 Prime UTR variant |
| rs12768205 | C>G,T | Intron variant | T2DM | Grau-Perez *et al.* 2017 |
| rs12774047 | G>A | Intron variant | CVD  CIMT | Wu *et al.* 2015  Wu *et al.* 2014 |
| rs17115203 | T>C | Intron variant |
| rs17881215 | G>C | Intron variant | DM | Drobná *et al.* 2012 |
| rs3740390 | C>T | Intron variant |
| rs3740390 | C>T | Intron variant | CVD  CIMT | Wu *et al.* 2015  Wu *et al.* 2014 |
| rs3740392 | T>C | Intron variant |
| rs3740393 | G>C,T | Intr0n variant | DM | Drobná *et al.* 2012 |
| CVD  CIMT | Wu *et al.* 2015  Wu *et al.* 2014 |
| rs3740394 | A>G | Intron variant |
| rs4290163 | G>C,T | None | SBP | Farzan *et al.* 2016 |
| BP |
| CVD  CIMT | Wu *et al.* 2015  Wu *et al.* 2014 |
| rs4917996 | A>C | Intron variant |
| rs4919690 | T>C | Intron variant |
| rs4919694 | T>A,C | Intron variant |
| rs7085854 | T>C | Intron variant |
| rs7096169 | A>C,G,T | Intron variant |
| rs7100709 | A/C | Intron variant |
| rs7907785 | A/G | Intron variant |
| rs9527 | C/T | Intron variant | SBP | Farzan *et al.* 2016 |
| CVD  CIMT | Wu *et al.* 2015  Wu *et al.* 2014 |
| *ATXN2L* | Ataxin 2 Like | rs8049439 | T>A,C,G | Intron variant | T2DM | Grau-Perez et al. 2018 |
| *BCL11A* | BAF Chromatin Remodeling Complex Subunit BCL11A | rs2058703 | G>A,C | 3 Prime UTR variant | T2DM | Pan *et al.* 2013 |
| *BCS1L* | Ubiquinol-Cytochrome C Reductase Complex Chaperone | rs2243911 | C>G,T | Intron variant | T2DM | Grau-Perez et al. 2018 |
| *CAT* | Catalase | rs1001179 | C>G,T | 2KB Upstream variant | HTN | Hsueh *et al.* 2005 |
| rs1049982 | T>A,C,G | 5 Prime UTR variant | T2DM | Grau-Perez et al. 2018 |
| rs511895 | T>C | Intron variant |
| rs7104301 | A>G | 500B Downstream variant |
| rs769217 | C>T | Synonymous variant |
| rs769218 | G>A,C | Intron variant |
| *CBS* | Cystathionine beta synthase | rs1005585 | T>C | Intron variant | CVD  CIMT | Wu *et al.* 2015  Wu *et al.* 2014 |
| rs1051319 | G>C | Noncoding transcript variant |
| rs11203172 | G>T | Intron variant |
| rs11700748 | C>A,G,T | 500B Downstream variant |
| rs11701048 | C>T | Intron variant |
| rs11910385 | T>GG | Intron variant |
| rs12613 | C>T | Noncoding transcript variant |
| rs13046443 | C>T | Intron variant |
| rs1789953 | C>A,T | Intron variant |
| rs2014564 | T,C | Intron variant | DBP | Farzan *et al.* 2016 |
| CVD  CIMT | Wu *et al.* 2015  Wu *et al.* 2014 |
| rs2124459 | T>C,G | Intron variant | DBP | Farzan *et al.* 2016 |
| BP |
| CVD  CIMT | Wu *et al.* 2015  Wu *et al.* 2014 |
| rs2124461 | T>A,C,G | Intron variant |
| rs2298760 | C>A,T | Intron variant |
| rs234701 | A>C,G,T | Intron variant | DBP | Farzan *et al.* 2016 |
| BP |
| CVD  CIMT | Wu *et al.* 2015  Wu *et al.* 2014 |
| rs234704 | G>A | Intron variant |
| rs234705 | C>G,T | Noncoding transcript variant |
| rs234706 | G>A | Synonymous variant |
| rs234709 | C>T | Intron variant | DBP | Farzan *et al.* 2016 |
| BP |
| CVD  CIMT | Wu *et al.* 2015  Wu *et al.* 2014 |
| rs234713 | G>A | Synonymous variant |
| rs234715 | G>T | Noncoding transcript variant |
| rs2849727 | C>A,G,T | Noncoding transcript variant | BP | Farzan *et al.* 2016 |
| CVD  CIMT | Wu *et al.* 2015  Wu *et al.* 2014 |
| rs2851391 | T>C | Intron variant |
| rs2851392 | G>A,C,T | Intron variant |
| rs34040148 | T>G | Missense variant |
| rs3788050 | G>T | Intron variant | BP | Farzan *et al.* 2016 |
| CVD  CIMT | Wu *et al.* 2015  Wu *et al.* 2014 |
| rs3788053 | G>A | Intron variant |
| rs397589 | G>T | Intron variant |
| rs4920037 | G>A | Intron variant |
| rs6586281 | G>A | Noncoding transcript variant | BP | Farzan *et al.* 2016 |
| CVD  CIMT | Wu *et al.* 2015  Wu *et al.* 2014 |
| rs6586282 | C>T | Noncoding transcript variant |
| rs6586283 | T>C | Intron variant |
| rs706208 | A>C,G,T | Noncoding transcript variant | BP | Farzan *et al.* 2016 |
| CVD  CIMT | Wu *et al.* 2015  Wu *et al.* 2014 |
| rs7276016 | G>A | Intron variant |
| rs760124 | T>C | Intron variant |
| rs8131163 | C>T | Missense variant |
| rs8132811 | C>T | Intron variant |
| rs9978863 | G>A,T | Noncoding transcript variant |
| rs9982015 | T>A,C | Intron variant |
| rs9983620 | A>G | Intron variant | BP | Farzan *et al.* 2016 |
| CVD  CIMT | Wu *et al.* 2015  Wu *et al.* 2014 |
| *CCM3* | Programmed cell death protein 10 | rs3804610 | T>C | Intron variant | BP | Gao *et al.* 2018 |
| rs6784267 | C>T | Intron variant |
| rs9818496 | C>T | Intron variant |
| *CDC123* | Cell division cycle protein 123 homolog | rs1051055 | A>G | 3 Prime UTR variant | T2DM | Pan *et al.* 2013 |
| rs12126 | T>A | 3 Prime UTR variant |
| *CDKAL1* | CDK5 Regulatory Subunit Associated Protein 1 Like 1 | rs7754840 | G>A,C,T | Intron variant | T2DM | Grau-Perez et al. 2018 |
| *CDKN2A* | Cyclin Dependent Kinase Inhibitor 2A | rs3088440 | G>A | 3 Prime UTR variant | T2DM | Pan *et al.* 2013 |
| *CDKN2B* | Cyclin Dependent Kinase Inhibitor 2B | rs1063192 | G>A,T | Intron variant | T2DM | Pan *et al.* 2013 |
| rs3217986 | T>G | 3 Prime UTR variant |
| rs3217992 | C>G,T | 3 Prime UTR variant |
| *CENTD2* | Arf-GAP with Rho-GAP domain | rs11603334 | G>A,T | Noncoding transcript variant | T2DM | Pan *et al.* 2013 |
| *CETP* | Cholesteryl Ester Transfer Protein | rs1800774 | C>G,T | Intron variant | T2DM | Grau-Perez et al. 2018 |
| rs4783962 | T>A,C | 2KB Upstream variant |
| rs5882 | G>A,C | Missense variant |
| *COX5A* | Cytochrome C Oxidase Subunit 5A | rs1133322 | A>C,G | 3 Prime UTR variant | T2DM | Grau-Perez et al. 2018 |
| *COX5B* | Cytochrome C Oxidase Subunit 5B | rs1470625 | C>A,T | None | T2DM | Grau-Perez et al. 2018 |
| *COX6B1* | Cytochrome c oxidase 6B1 | rs4806187 | A>C,G,T | 500B Downstream variant | T2DM | Grau-Perez et al. 2018 |
| *COX6B2* | Cytochrome C Oxidase Subunit 6B2 | rs1058511 | C>A,G | 3 Prime UTR variant | T2DM | Grau-Perez et al. 2018 |
| *COX7A1* | Cytochrome C Oxidase Subunit 7A1 | rs753420 | T>G | 2KB Upstream variant | T2DM | Grau-Perez et al. 2018 |
| *CRP* | C-reactive protein | rs1130864 | G>A | Intron variant | T2DM | Grau-Perez et al. 2018 |
| rs1205 | C>T | 3 Prime UTR variant |
| *CYBA* | Cytochrome B-245 Alpha Chain | rs12709102 | T>C,G | Intron variant | CVD  CIMT | Wu *et al.* 2015  Wu *et al.* 2014 |
| rs12933505 | A>G,T | Intron variant |
| rs13306295 | G>A,T | Intron variant |
| rs13306296 | G>A | 2KB Upstream variant | BP | Farzan *et al.* 2016 |
| CVD  CIMT | Wu *et al.* 2015  Wu *et al.* 2014 |
| rs16966653 | C>G | Intron variant |
| rs3180279 | C>G,T | Intron variant |
| rs3199601 | G>A | Intron variant |
| rs3794624 | G>A | Intron variant | DBP | Farzan *et al.* 2016 |
| BP |
| CVD  CIMT | Wu *et al.* 2015  Wu *et al.* 2014 |
| rs4782391 | A>G,T | Intron variant |
| rs4782393 | A>G,T | Intron variant |
| rs7195830 | A>G,T | 3 Prime UTR variant | T2DM | Grau-Perez et al. 2018 |
| rs9925947 | A>C,G | 500B Downstream variant | CVD  CIMT | Wu *et al.* 2015  Wu *et al.* 2014 |
| rs9940427 | G>A,C,T | Missense variant |
| *CYP11B1* | Cytochrome P450 Family 11 Subfamily B Member 1 | rs5299 | T>C,G | 3 Prime UTR variant | T2DM | Grau-Perez et al. 2018 |
| *EDN1* | Endothelin 1 | rs1800541 | T>G | Intron variant | T2DM | Martíz-Barquero *et al.* 2015 |
| Grau-Perez et al. 2018 |
| rs2070699 | G>C,T | Intron variant | Martíz-Barquero *et al.* 2015 |
| Grau-Perez et al. 2018 |
| rs3087459 | A>C | Intron variant | Martíz-Barquero *et al.* 2015 |
| Grau-Perez et al. 2018 |
| rs5370 | G>T | Missense variant | Martíz-Barquero *et al.* 2015 |
| Grau-Perez et al. 2018 |
| *EDN2* | Endothelin 2 | rs11210262 | C>G,T | 500B Downstream variant | T2DM | Martíz-Barquero *et al.* 2015 |
| rs11572340 | C>A,T | 2KB Upstream variant |
| Grau-Perez et al. 2018 |
| *EDN3* | Endothelin 3 | rs11570257 | G>A | Intron variant | T2DM | Martíz-Barquero *et al.* 2015 |
| rs260741 | G>A,T | Intron variant |
| Grau-Perez et al. 2018 |
| *EDNRA* | Endothelin Receptor Type A | rs1801708 | G>A,C | Noncoding transcript variant | T2DM | Martíz-Barquero *et al.* 2015 |
| Grau-Perez et al. 2018 |
| rs5333 | T>C | Synonymous variant | Martíz-Barquero *et al.* 2015 |
| rs5334 | G>A | Synonymous variant |
| rs5335 | G>A,C,T | Noncoding transcript variant |
| Grau-Perez et al. 2018 |
| rs5342 | A>G,T | Noncoding transcript variant | Martíz-Barquero *et al.* 2015 |
| Grau-Perez et al. 2018 |
| rs6842241 | C>A | 2KB Upstream variant | Martíz-Barquero *et al.* 2015 |
| *EDNRB* | Endothelin Receptor Type B | rs12716722 | T>A,C | Intron variant | T2DM | Martíz-Barquero *et al.* 2015 |
| rs3759475 | A>C,G | Intron variant |
| Grau-Perez et al. 2018 |
| rs5351 | T>C,G | Synonymous variant | Martíz-Barquero *et al.* 2015 |
| Grau-Perez et al. 2018 |
| rs5352 | C>T | Missense variant | Martíz-Barquero *et al.* 2015 |
| *ETV5* | ETS Variant Transcription Factor 5 | rs7647305 | T>C | None | T2DM | Grau-Perez et al. 2018 |
| *FABP2* | Fatty acid-binding protein 2 | rs10034579 | A>C,G,T | 2KB Upstream variant | T2DM | Grau-Perez et al. 2018 |
| rs1511025 | T>C | Synonymous variant |
| rs2282688 | T>A,C,G | 2KB Upstream variant |
| rs6857641 | T>C,G | 2KB Upstream variant |
| *FADS1* | Fatty Acid Desaturase 1 | rs174546 | C>T | 3 Prime UTR variant | T2DM | Grau-Perez et al. 2018 |
| *FADS2* | Fatty Acid Desaturase 2 | rs174577 | C>A | Intron variant | T2DM | Grau-Perez et al. 2018 |
| rs174611 | T>C | Intron variant |
| rs174616 | G>A | Intron variant |
| *FAIM2* | Fas Apoptotic Inhibitory Molecule 2 | rs7138803 | G>A,T | None | T2DM | Grau-Perez et al. 2018 |
| *FTO* | Fat Mass and Obesity-related transcript | rs1121980 | G>A,C | Intron variant | T2DM | Grau-Perez et al. 2018 |
| rs1421085 | T>C | Intron variant |
| rs3751812 | G>T | Intron variant |
| rs6499640 | G>A | Intron variant |
| rs7190492 | A>G,T | Intron variant |
| rs8044769 | T>A,C,G | Intron variant |
| rs8050136 | C>A | Intron variant |
| rs9939609 | T>A | Intron variant |
| *GCLC* | Glutamate—cysteine ligase catalytic subunit | rs11415624 | ->A | 3 Prime UTR variant | T2DM | Grau-Perez et al. 2018 |
| rs2066511 | C>G,T | Intron variant |
| rs3736729 | A>C | Intron variant |
| *GCLM* | Glutamate-Cysteine Ligase Modifier Subunit | rs7515191 | G>A | Intron variant | T2DM | Grau-Perez et al. 2018 |
| rs769211 | C>A | Intron variant |
| *GDF9* | Growth Differentiation Factor 9 | rs30177 | C>G | 2KB Upstream variant | T2DM | Grau-Perez et al. 2018 |
| rs39830 | G>A,C | Intron variant |
| *GNPDA2* | Glucosamine-6-Phosphate Deaminase 2 | rs10938397 | A>G | None | T2DM | Grau-Perez et al. 2018 |
| *GPX4* | Glutathione Peroxidase 4 | rs757228 | A>C,G,T | None | T2DM | Grau-Perez et al. 2018 |
| *GPX6* | Glutathione Peroxidase 6 | rs406113 | A>C | Missense variant | T2DM | Grau-Perez et al. 2018 |
| *GSR* | Glutathione-Disulfide Reductase | rs2911678 | A>C,G,T | Intron variant | T2DM | Grau-Perez et al. 2018 |
| rs2978663 | C>T | Intron variant | T2DM |
| rs4628224 | A>G,T | Intron variant | T2DM |
| *GSS* | Glutathione Synthetase | rs2273684 | T>G | Intron variant | T2DM | Grau-Perez et al. 2018 |
| rs3761144 | C>G,T | Intron variant | T2DM |
| *GSTM1* | Glutathione S-Transferase Mu 1 | -- |  | Gene deletion | CA | Wang *et al*. 2007 |
| rs1634252 | T>C | 2KB Upstream variant | CVD  CIMT | Wu *et al.* 2015  Wu *et al.* 2014 |
| rs2071487 | T>C | Synonymous variant |
| rs2239892 | A>C,G | Intron variant |
| rs412543 | G>A,C,T | 2KB Upstream variant |
| rs4147563 | C>A,T | 2KB Upstream variant |
| rs4147567 | A>G | Intron variant | SBP | Farzan *et al.* 2016 |
| DBP |
| BP |
| CVD  CIMT | Wu *et al.* 2015  Wu *et al.* 2014 |
| rs737497 | T>C | Intron variant |
| *GSTO1* | Glutathione S-transferase omega-1 | rs1147611 | G>A,T | Intron variant | CVD  CIMT | Wu *et al.* 2015  Wu *et al.* 2014 |
| rs11509438 | G>A | Missense variant |
| rs17116736 | A>G,T | Intron variant |
| rs2282326 | A>C | Intron variant |
| rs4925 | C>A | Missense variant | CA | Hsieh *et al.* 2011 |
| MetS | Chen *et al.* 2012 |
| ECG abnor | Liao *et al.* 2009 |
| CVD  CIMT | Wu *et al.* 2015  Wu *et al.* 2014 |
| *GSTO2* | Glutathione S-Transferase Omega 2 | rs156697 | A>G,T | Missense variant | CA | Hsieh *et al.* 2011 |
| MetS | Chen *et al.* 2012 |
| ECG abnor | Liao *et al.* 2009 |
| rs2297235 | A>G | 5 Prime UTR variant | CA | Hsieh *et al.* 2011 |
| *GSTP1* | Glutathione S-transferase P | rs1138272 | C>G,T | Missense variant | CVD | Wu *et al.* 2015 |
| rs1695 | A>G | 2KB Upstream variant | SBP | Farzan *et al.* 2016 |
| CA | Wang *et al*. 2007 |
| CVD  CIMT | Wu *et al.* 2015  Wu *et al.* 2014 |
| rs4147581 | C>G | Intron variant |
| rs5031031 | A>G | 3 Prime UTR variant |
| rs6591256 | A>G | 2KB Upstream variant | SBP | Farzan *et al.* 2016 |
| CVD  CIMT | Wu *et al.* 2015  Wu *et al.* 2014 |
| rs749174 | G>A | Intron variant | DBP | Farzan *et al.* 2016 |
| BP |
| CVD  CIMT | Wu *et al.* 2015  Wu *et al.* 2014 |
| rs8191431 | C>T | 2KB Upstream variant |
| rs8191439 | G>A | 5 Prime UTR variant |
| rs8191446 | G>C | 500B Downstream variant |
| rs8191449 | G>A | Intron variant |
| rs947895 | C>A,T | 500B Downstream variant |
| *GSTT1* | Glutathione S-transferase theta-1 | rs1695 | A>G,T | Missense variant | CA | Wang *et al*. 2007 |
| rs2234953 | C>T | -- | CVD  CIMT | Wu *et al.* 2015  Wu *et al.* 2014 |
| rs2266635 | C>T | Missense variant |
| rs4630 | G>A | 3 Prime UTR variant | DBP | Farzan *et al.* 2016 |
| CVD  CIMT | Wu *et al.* 2015  Wu *et al.* 2014 |
| *HMOX1* | Heme Oxygenase 1 | rs11555832 | A>G,T | 3 Prime UTR variant | CVD  CIMT | Wu *et al.* 2015  Wu *et al.* 2014 |
| rs11912889 | G>A | Intron variant |
| rs16995662 | A>G | Intron variant | SBP | Farzan *et al.* 2016 |
| CVD  CIMT | Wu *et al.* 2015  Wu *et al.* 2014 |
| rs17879606 | C>T | Intron variant |
| rs17880294 | C>T | Intron variant |
| rs17882597 | T>- | Intron variant |
| rs17885185 | C>T | Intron variant |
| rs17885522 | C>A | Intron variant |
| rs17885925 | T>A,C | Intron variant |
| rs17886055 | T>C | Intron variant |
| rs2003038 | C>A,G,T | Intron variant |
| rs2071748 | G>A,T | Intron variant |
| rs2071749 | A>C,G,T | Intron variant |
| rs2269534 | T>A,C | Intron variant | SBP | Farzan *et al.* 2016 |
| CVD  CIMT | Wu *et al.* 2015  Wu *et al.* 2014 |
| rs2285112 | A>G,T | Intron variant |
| rs4820192 | A>C,T | Intron variant |
| rs5755713 | G>C | Missense variant |
| rs5755718 | T>C | Intron variant | SBP | Farzan *et al.* 2016 |
| CVD  CIMT | Wu *et al.* 2015  Wu *et al.* 2014 |
| rs5755720 | A>G | Intron variant |
| rs5995098 | C>A,G,T | Intron variant |
| rs5995099 | C>T | Intron variant |
| rs6518952 | C>T | Intron variant |
| rs8139532 | G>A | Intron variant | SBP | Farzan *et al.* 2016 |
| CVD  CIMT | Wu *et al.* 2015  Wu *et al.* 2014 |
| rs8140370 | T>G | Intron variant |
| rs8140669 | T>A | Intron variant |
| rs9607267 | T>A,C | Intron variant |
| rs9622194 | G>A,C | Intron variant |
| *ICAM1* | Intercellular Adhesion Molecule 1 | rs281432 | C>G | Intron variant | CVD  CIMT | Wu *et al.* 2015  Wu *et al.* 2014 |
| rs281433 | A>C | Intron variant |
| rs3093032 | C>T | 3 Prime UTR variant |
| rs5030340 | C>T | Intron variant |
| rs5030351 | C>T | Intron variant |
| rs5030354 | A>C | Intron variant |
| rs5030362 | C>A | Intron variant |
| rs5490 | A>C | 5 Prime UTR variant |
| rs5493 | G>T | Synonymous variant |
| rs5495 | G>A | Missense variant |
| rs5496 | G>A | Intron variant |
| rs5498 | A>G | Missense variant |
| *IDE* | Insulin Degrading Enzyme | rs4646954 | G>A,C | Noncoding transcript variant | T2DM | Pan *et al.* 2013 |
| *IGF2BP2* | Insulin Like Growth Factor 2 MRNA Binding Protein 2 | rs4402960 | G>C,T | Intron variant | T2DM | Grau-Perez et al. 2018 |
| *IL10* | Interleukin 10 | rs1800871 | A>G | Intron variant | T2DM | Grau-Perez et al. 2018 |
| rs1800896 | T>C | 2KB Upstream variant | T2DM |
| rs3024496 | A>G | Noncoding transcript variant | T2DM |
| *IL10RA* | Interleukin 10 Receptor Subunit Alpha | rs9610 | G>A,T | Noncoding transcript variant | T2DM | Grau-Perez et al. 2018 |
| *IL10RB* | Interleukin 10 Receptor Subunit Beta | rs1058867 | G>A | 3 Prime UTR variant | T2DM | Grau-Perez et al. 2018 |
| *IL18* | Interleukin 18 | rs1834481 | C>G | Intron variant | T2DM | Grau-Perez et al. 2018 |
| rs549908 | T>A,G | Synonymous variant | T2DM |
| *IL18R1* | Interleukin 18 Receptor 1 | rs2287037 | C>G,T | Intron variant | T2DM | Grau-Perez et al. 2018 |
| *IL18RAP* | Interleukin 18 receptor accessory protein | rs2293224 | T>A,C | Intron variant | T2DM | Grau-Perez et al. 2018 |
| *IL1RL1* | Interleukin 1 receptor-like 1 | rs11685424 | G>A,C,T | 2KB Upstream variant | T2DM | Grau-Perez et al. 2018 |
| *IL6* | Interleukin 6 | rs11544633 | T>C | Missense variant | CVD  CIMT | Wu *et al.* 2015  Wu *et al.* 2014 |
| rs13306435 | T>A,C | Missense variant | SBP | Farzan *et al.* 2016 |
| CVD  CIMT | Wu *et al.* 2015  Wu *et al.* 2014 |
| rs1474347 | C>A,G | Intron variant | SBP | Farzan *et al.* 2016 |
| CVD  CIMT | Wu *et al.* 2015  Wu *et al.* 2014 |
| rs1524107 | C>G,T | Intron variant | DBP | Farzan *et al.* 2016 |
| BP |
| CVD | Wu *et al.* 2015  Wu *et al.* 2014 |
| rs1548216 | G>C | Intron variant | CIMT |
| rs1554606 | T>A,G | Intron variant | SBP | Farzan *et al.* 2016 |
| BP |
| CVD  CIMT | Wu *et al.* 2015  Wu *et al.* 2014 |
| rs1800795 | C>G,T | Intron variant | T2DM | Grau-Perez et al. 2018 |
| rs2069830 | C>T | Missense variant | CVD  CIMT | Wu *et al.* 2015  Wu *et al.* 2014 |
| rs2069832 | A>C,G,T | Intron variant |
| rs2069835 | T>C | Intron variant |
| rs2069838 | C>T | Intron variant |
| rs2069840 | C>G | Intron variant | SBP | Farzan *et al.* 2016 |
| CVD | Wu *et al.* 2015  Wu *et al.* 2014 |
| rs2069842 | G>A,T | Missense variant |
| rs2069843 | G>A | Intron variant |
| rs2069845 | G>A,C,T | Intron variant | BP | Farzan *et al.* 2016 |
| CVD  CIMT | Wu *et al.* 2015  Wu *et al.* 2014 |
| rs2069847 | G>A | Intron variant |
| rs2069849 | C>G,T | Missense variant |
| rs4335044 | A>G,T | Noncoding transcript variant |
| *IL6R* | Interleukin 6 Receptor | rs2228145 | A>C,T | Missense variant | T2DM | Grau-Perez et al. 2018 |
| rs7518199 | A>C,T | Intron variant | T2DM |
| *IL6ST* | Interleukin 6 Cytokine Family Signal Transducer | rs6870870 | C>A,T | Intron variant | T2DM | Grau-Perez et al. 2018 |
| *IL8* | Interleukin 8 | rs2227543 | C>T | Intron variant | T2DM | Grau-Perez et al. 2018 |
| rs4073 | A>C,G,T | 2KB Upstream variant | T2DM |
| *IL8RA* | Interleukin 8 receptor, alpha | rs1008562 | G>A,C,T | None | T2DM | Grau-Perez et al. 2018 |
| rs1008563 | G>A | None | T2DM |
| *IL8RB* | Interleukin 8 receptor, beta | rs4674259 | G>A,T | Intron variant | T2DM | Grau-Perez et al. 2018 |
| *INSIG2* | Insulin Induced Gene 2 | rs7566605 | C>A,G,T | Intron variant | T2DM | Grau-Perez et al. 2018 |
| *KEAP1* | Kelch-like ECH-associated protein 1 | rs11545829 | G>A,C | Stop gained | T2DM | Fan et al. 2022 |
| *KCNQ1* | Potassium Voltage-Gated Channel Subfamily Q Member 1 | rs1057128 | G>A | Synonymous variant | T2DM | Pan *et al.* 2013 |
| rs10798 | A>C,G,T | 3 Prime UTR variant | T2DM |
| rs8234 | A>G | 3 Prime UTR variant | T2DM |
| *KCTD15* | Potassium Channel Tetramerization Domain Containing 15 | rs11084753 | A>C,G,T | None | T2DM | Grau-Perez et al. 2018 |
| rs29941 | A>G,T | None | T2DM |
| *HMGA2* | High Mobility Group AT-Hook 2 | rs343092 | T>C,G | Intron variant | T2DM | Pan *et al.* 2013 |
| *LAMA1* | Laminin Subunit Alpha 1 | rs617206 | C>T | Synonymous variant | T2DM | Grau-Perez et al. 2018 |
| *LGR5* | Leucine Rich Repeat Containing G Protein-Coupled Receptor 5 | rs17109924 | T>C | Missense variant | T2DM | Pan *et al.* 2013 |
| *LIPC* | Lipase C, Hepatic Type | rs1077834 | T>A,C,G | Intron variant | T2DM | Grau-Perez et al. 2018 |
|  |  |  |  |
| rs1800588 | C>A,G,T | Intron variant | T2DM |
| rs6083 | A>C,G | Missense variant | T2DM |
| *LPL* | Lipoprotein lipase | rs10099160 | T>G | Intron variant | T2DM | Grau-Perez et al. 2018 |
| rs256 | C>T | Intron variant | T2DM |
| rs320 | T>A,G | Intron variant | T2DM |
| *MAF* | MAF BZIP Transcription Factor | rs1424233 | T>C | None | T2DM | Grau-Perez et al. 2018 |
| *MC4R* | Melanocortin-4-receptor | rs12970134 | G>A | None | T2DM | Grau-Perez et al. 2018 |
| *MCP-1* | Monocyte chemoattractant protein-1 | rs1024611 | A>G | None | CA | Hsieh et al. 2007 |
| *MPO* | Myeloperoxidase | rs2107545 | A>G | 2KB Upstream variant | T2DM | Grau-Perez et al. 2018 |
| *MSRA* | Methionine Sulfoxide Reductase A | rs10098474 | C>T | 2KB Upstream variant | T2DM | Grau-Perez et al. 2018 |
| rs6996446 | G>A,T | 500B Downstream variant | T2DM |
| *MSRB2* | Methionine Sulfoxide Reductase B2 | rs11013291 | T>A,C,G | Intron variant | T2DM | Grau-Perez et al. 2018 |
| *MTCH2* | Mitochondrial Carrier 2 | rs10838738 | A>G | Intron variant | T2DM | Grau-Perez et al. 2018 |
| rs4752856 | G>A | Intron variant | T2DM |
| *MTHFR* | Methylenetetrahydrofolate reductase | rs11121832 | T>A,C | Intron variant | CVD  CIMT | Wu *et al.* 2015  Wu *et al.* 2014 |
| rs12121543 | C>A | Intron variant |
| rs13306560 | C>T | 2KB Upstream variant |
| rs1413355 | T>C | Intron variant |
| rs1476413 | C>G,T | Intron variant |
| rs1537516 | G>A | 3 Prime UTR variant |
| rs17037388 | A>G | Intron variant |
| rs17037390 | G>A | Intron variant |
| rs17037404 | G>A | Intron variant |
| rs17367504 | A>G | Intron variant |
| rs17367629 | C>T | Intron variant |
| rs17421462 | G>A,T | Intron variant |
| rs17421511 | G>A | Intron variant |
| rs1801131 | T>G | Missense variant |
| rs1801133 | G>A,C | Missense variant |
| rs1994798 | G>A | Intron variant |
| rs2066461 | G>A,T | Synonymous variant |
| rs2066466 | C>A,G,T | Synonymous variant |
| rs2066471 | C>G,T | Intron variant |
| rs2077360 | A>G,T | 3 Prime UTR variant |
| rs2184226 | T>C | 3 Prime UTR variant |
| rs28484963 | T>C,G | 3 Prime UTR variant |
| rs3737965 | G>A | Intron variant |
| rs3753582 | A>C | Intron variant |
| rs3753584 | T>C | Intron variant |
| rs3753588 | C>T | Noncoding transcript variant |
| rs41452445 | T>C | Intron variant |
| rs4845884 | G>A,C | 3 Prime UTR variant |
| rs4846048 | G>A,C | 3 Prime UTR variant |
| rs4846049 | T<A,G | 3 Prime UTR variant |
| rs4846050 | T>A,C | Intron variant |
| rs4846052 | T>A,C | Intron variant |
| rs6541003 | G>A,C | Intron variant |
| rs6700268 | C>A,G,T | Intron variant |
| rs7518348 | A>C,G | Intron variant |
| rs7533315 | T>C | Intron variant |
| rs7547068 | G>A | Intron variant |
| rs9651118 | T>A,C | Intron variant | BP | Farzan *et al.* 2016 |
| CVD  CIMT | Wu *et al.* 2015  Wu *et al.* 2014 |
| *NCF2* | Neutrophil Cytosolic Factor 2 | rs2274064 | T>A,C,G | Missense variant | T2DM | Grau-Perez et al. 2018 |
| rs2296164 | C>G,T | Intron variant |
| *NCF4* | Neutrophil Cytosolic Factor 4 | rs2075939 | T>A,C,G | Missense variant | T2DM | Grau-Perez et al. 2018 |
| rs4820258 | T>C | 2KB Upstream variant |
| *NDUFS1* | NADH:Ubiquinone Oxidoreductase Core Subunit S1 | rs1053517 | A>G | 3 Prime UTR variant | T2DM | Grau-Perez et al. 2018 |
| *NDUFS2* | NADH:Ubiquinone Oxidoreductase Core Subunit S2 | rs11587213 | A>G | 2KB Upstream variant | T2DM | Grau-Perez et al. 2018 |
| rs4656993 | A>G | Intron variant |
| *NDUFS3* | NADH:Ubiquinone Oxidoreductase Core Subunit S3 | rs10838732 | C>A,G,T | 2KB Upstream variant | T2DM | Grau-Perez et al. 2018 |
| rs2280231 | C>T | 2KB Upstream variant |
| *NDUFS4* | NADH:Ubiquinone Oxidoreductase Core Subunit S4 | rs535277 | T>A,G | Intron variant | T2DM | Grau-Perez et al. 2018 |
| rs567 | G>A | Noncoding transcript variant |
| *NDUFS6* | NADH:Ubiquinone Oxidoreductase Core Subunit S6 | rs11953620 | C>T | None | T2DM | Grau-Perez et al. 2018 |
| *NDUFS7* | NADH:Ubiquinone Oxidoreductase Core Subunit S7 | rs11666067 | C>A,G,T | Missense variant | T2DM | Grau-Perez et al. 2018 |
| rs3848638 | G>A,C,T | 2KB Upstream variant |
| *NDUFS8* | NADH:Ubiquinone Oxidoreductase Core Subunit S8 | rs10896288 | C>A,G | 2KB Upstream variant | T2DM | Grau-Perez et al. 2018 |
| rs4147779 | G>A,C | 2KB Upstream variant |
| rs4147780 | G>A | 2KB Upstream variant |
| *NEGR1* | Neuronal Growth Regulator 1 | rs2568958 | G>A | 3 Prime UTR variant | T2DM | Grau-Perez et al. 2018 |
| rs2815752 | G>A,C | Intron variant |
| rs3101336 | T>C | Intron variant |
| *NOS1* | Nitric oxide synthase 1 | rs2682826 | G>A | 3 Prime UTR variant | T2DM | Grau-Perez et al. 2018 |
| rs9658251 | A>C,G,T | 2KB Upstream variant |
| rs9658253 | C>T | 2KB Upstream variant |
| *NOS2A* | Nitric oxide synthase 2 | rs1060826 | T>A,C | Synonymous variant | T2DM | Grau-Perez et al. 2018 |
| rs2297520 | T>C | Intron variant |
| rs2779248 | T>C | 2KB Upstream variant |
| *NOS3* | Nitric Oxide Synthase 3 | rs1008140 | T>C | Intron variant | CVD  CIMT | Wu *et al.* 2015  Wu *et al.* 2014 |
| rs1541861 | C>A | Intron variant |
| rs1799983 | T>A,G | Missense variant | SBP  HTN | Farzan *et al.* 2016  Hsueh *et al.* 2005 |
| rs1800779 | G>A,C,T | Intron variant | CVD  CIMT | Wu *et al.* 2015  Wu *et al.* 2014 |
| rs1800783 | A>C,G,T | Intron variant |
| rs1808593 | G>A,C,T | Intron variant | BP | Farzan *et al.* 2016 |
| CVD  CIMT | Wu *et al.* 2015  Wu *et al.* 2014 |
| rs2853792 | G>A | Intron variant |
| rs2853795 | A>G | Intron variant |
| rs3793342 | G>A | Intron variant |
| rs3834873 | ->T | Intron variant |
| rs3918166 | G>A,C,T | Missense variant |
| rs3918169 | A>G | Intron variant |
| rs3918171 | G>A | Intron variant |
| rs3918181 | G>A | Intron variant |
| rs3918186 | A>T | Intron variant |
| rs3918188 | C>A,T | Intron variant |
| rs3918194 | C>- | Intron variant |
| rs3918198 | C>A | Intron variant | SBP | Farzan *et al.* 2016 |
| CVD  CIMT | Wu *et al.* 2015  Wu *et al.* 2014 |
| rs3918204 | ->T | Intron variant |
| rs3918226 | C>T | Intron variant |
| rs3918227 | C>A,G | Intron variant |
| rs6951150 | T>A,C | None |
| rs743506 | G>A,C | Intron variant | DBP | Farzan *et al.* 2016 |
| BP |
| CVD  CIMT | Wu *et al.* 2015  Wu *et al.* 2014 |
| rs743507 | C>G,T | Intron variant |
| rs7830 | G>T | Intron variant |
| rs891512 | A>C,G,T | Intron variant |
| *NOTCH2* | Notch Receptor 2 | rs1043964 | T>C | 3 Prime UTR variant | T2DM | Pan *et al.* 2013 |
| rs699779 | A>G | 3 Prime UTR variant |
| rs699780 | A>C,G | 3 Prime UTR variant |
| rs7527186 | C>T | 3 Prime UTR variant |
| rs835575 | G>T | 3 Prime UTR variant |
| rs835576 | T>C | 3 Prime UTR variant |
| *NOX3* | NADPH Oxidase 3 | rs231954 | C>G,T | Missense variant | T2DM | Grau-Perez et al. 2018 |
| *NOX5* | NADPH Oxidase 5 | rs12907196 | C>T | Missense variant | T2DM | Grau-Perez et al. 2018 |
| *NR3C2* | Nuclear Receptor Subfamily 3 Group C Member 2 | rs1040288 | G>C | Intron variant | T2DM | Grau-Perez et al. 2018 |
| rs10519952 | A>G | Intron variant |
| rs11099680 | G>A | Intron variant |
| rs12498662 | T>C,G | Intron variant |
| rs13116332 | G>A,T | Intron variant |
| rs13117325 | G>A,C | Intron variant |
| rs1403142 | A>C,G,T | Intron variant |
| rs1490453 | G>A | Intron variant |
| rs1512337 | G>A,C | Intron variant |
| rs1879829 | T>C,G | Intron variant |
| rs2070951 | G>A,C,T | Noncoding transcript variant |
| rs2272089 | C>A,G,T | Intron variant |
| rs2871 | C>G,T | Noncoding transcript variant |
| rs6535598 | T>C,G | Intron variant |
| rs7668847 | A>G,T | Intron variant |
| *N6AMT1* | N(6)-adenine-specific DNA methyltransferase | rs1997605 | G>A | Intron variant | GDM | Liang *et al.* 2023 |
| rs1003671 | G>A | Intron variant |
| *OGG1* | 8-oxoguanine DNA glycosylase | rs1052133 | C>G,T | Missense variant | HTN | Chen *et al.* 2011 |
| T2DM | Grau-Perez et al. 2018 |
| rs159153 | T>C | 2KB Upstream variant |
| rs2072668 | C>A,G | Intron variant |
| *CYBA* | Cytochrome B-245 Alpha Chain | rs4673 | A>G,T | Missense variant | HTN | Hsueh *et al.* 2005 |
| *P533* | Tumor protein P53 | rs1042522 | G>A,C,T | Missense variant | CA | Wang *et al*. 2007 |
| *PNP* | Purine Nucleoside Phosphorylase | rs1049562 | C>A,T | Missense variant | CVD  CIMT | Wu *et al.* 2015  Wu *et al.* 2014 |
| rs1049564 | G>A | Missense variant | CA | Hsieh *et al.* 2011 |
| CVD  CIMT | Wu *et al.* 2015  Wu *et al.* 2014 |
| rs1130650 | C>A,T | Synonymous variant | CA | Hsieh *et al.* 2011 |
| rs12101049 | G>A | Intron variant | CVD  CIMT | Wu *et al.* 2015  Wu *et al.* 2014 |
| rs1617940 | T>A | Intron variant | BP | Farzan *et al.* 2016 |
| CVD  CIMT | Wu *et al.* 2015  Wu *et al.* 2014 |
| rs17112168 | C>A | 2KB Upstream variant |
| rs1713420 | A>G | Intron variant |
| rs1713421 | T>A,G | Intron variant |
| rs1756369 | T>A | Intron variant |
| rs1760933 | T>A,C | 500B Downstream variant |
| rs1760935 | A>G | Intron variant |
| rs1760940 | A>C | Intron variant |
| rs17878900 | C>T | 500B Downstream variant |
| rs17879107 | T>G | Intron variant |
| rs17880290 | G>A | 2KB Upstream variant |
| rs17880503 | T>C,G | 2KB Upstream variant |
| rs17881184 | A>G | Intron variant |
| rs17881554 | T>A | Synonymous variant |
| rs17882836 | G>A,T | Intron variant | SBP | Farzan *et al.* 2016 |
| BP |
| CVD  CIMT | Wu *et al.* 2015  Wu *et al.* 2014 |
| rs17883795 | G>A | 500B Downstream variant |
| rs17885714 | A>G | Intron variant |
| rs17885917 | A>G | Intron variant |
| rs17886095 | G>A | Intron variant |
| rs3790062 | G>A | Intron variant |
| rs3790064 | A>G,T | Intron variant |
| *PON1* | Paraoxonase 1 | rs662 | T>A,C,G | Missense variant | ECG abnor | Liao *et al.* 2009 |
| T2DM | Grau-Perez et al. 2018 |
| rs705379 | G>A,C,T | 2KB Upstream variant | ECG abnor | Liao *et al.* 2009 |
| rs854560 | A>C,G,N,T | Missense variant | ECG abnor |
| rs854571 | T>C | 2KB Upstream variant | T2DM | Grau-Perez et al. 2018 |
| *PON2* | Paraoxonase 2 | rs17876142 | G>C | Missense variant | ECG abnor | Liao *et al.* 2009 |
| rs17876171 | G>C,T | Missense variant |
| *PPARA* | Peroxisome Proliferator Activated Receptor Alpha | rs135542 | T>A,C,G | Intron variant | T2DM | Grau-Perez et al. 2018 |
| rs135549 | T>C | Intron variant |
| rs4253765 | C>T | Intron variant |
| rs5766743 | A>G | Intron variant |
| rs8138102 | A>G | Intron variant |
| *PPARG* | Peroxisome proliferator- activated receptor gamma | rs1175543 | A>G | Intron variant | T2DM | Grau-Perez et al. 2018 |
| rs12490265 | G>A,T | Intron variant |
| rs2938392 | G>A,T | Intron variant |
| rs7645903 | A>T | Intron variant |
| *PPARGC1A* | PPARG coactivator 1 alpha | rs2932966 | A>C | Intron variant | T2DM | Grau-Perez et al. 2018 |
| rs2970848 | A>C,G | Intron variant |
| rs2970853 | A>C,G,T | Intron variant |
| rs2970870 | A>G | Intron variant |
| rs3755863 | C>A,G,T | Synonymous variant |
| rs4697046 | C>A,T | Intron variant |
| rs6838600 | A>C,G,T | Intron variant |
| rs8192678 | C>T | Missense variant |
| *PRC1* | Protein Regulator of cytokinesis 1 | rs12911192 | T>C | Missense variant | T2DM | Pan *et al.* 2013 |
| rs14280 | A>G | 3 Prime UTR variant |
| rs7601 | T>A,C,G | 3 Prime UTR variant |
| *PRL* | Prolactin | rs4712652 | G>A,C,T | Intron variant | T2DM | Grau-Perez et al. 2018 |
| *RAC2* | Rac Family Small GTPase 2 | rs6572 | C>G | 3 Prime UTR variant | T2DM | Grau-Perez et al. 2018 |
| rs9798725 | A>C,G,T | 500B Downstream variant |
| *REN* | Renin | rs11571080 | T>A,C | Intron variant | T2DM | Grau-Perez et al. 2018 |
| rs3215332 | CC>-,C | Intron variant |
| rs5707 | A>C,G,T | Intron variant |
| *S1PR1* | Sphingosine-1-Phosphate Receptor 1 | rs1411017 | T>A,C | Intron variant | CVD  CIMT | Wu *et al.* 2015  Wu *et al.* 2014 |
| rs17100954 | G>A,T | Intron variant |
| rs3737577 | G>T | 5 Prime UTR variant |
| rs3753194 | A>C,G | Intron variant | DBP | Farzan *et al.* 2016 |
| CVD  CIMT | Wu *et al.* 2015  Wu *et al.* 2014 |
| rs4987248 | G>C,T | 5 Prime UTR variant |
| rs7549921 | C>A,G,T | Missense variant |
| *SCNN1A* | Sodium Channel Epithelial 1 Subunit Alpha | rs4149570 | A>C,G,T | 2KB Upstream variant | T2DM | Grau-Perez et al. 2018 |
| *SDHB* | Iron-sulfur protein subunit of the succinate dehydrogenase (SDH) enzyme | rs11203280 | G>A,T | None | T2DM | Grau-Perez et al. 2018 |
| rs9435739 | G>A,T | None |
| *SDHD* | Succinate dehydrogenase [ubiquinone] cytochrome b small subunit | rs10891319 | A>G | None | T2DM | Grau-Perez et al. 2018 |
| *SH2B1* | SH2B Adaptor Protein 1 | rs4788102 | G>A | Intron variant | T2DM | Grau-Perez et al. 2018 |
| *SLC30A8* | Solute Carrier Family 30 Member 8 | rs10282940 | G>A | 3 Prime UTR variant | T2DM | Pan *et al.* 2013 |
| rs11558471 | A>G | 3 Prime UTR variant |
| rs13266634 | C>A,T | Missense variant | Grau-Perez et al. 2018 |
| rs2466292 | C>G,T | Intron variant |
| rs2466293 | A>G | 3 Prime UTR variant | Pan *et al.* 2013 |
| rs6469675 | A>G | Intron variant | Grau-Perez et al. 2018 |
| *SOD1* | Superoxide dismutase 1 | rs202445 | C>G,T | None | T2DM | Grau-Perez et al. 2018 |
| *SOD2* | Manganese superoxide dismutase | rs10370 | T>G | Intron variant | BP | Farzan *et al.* 2016 |
| CVD  CIMT | Wu *et al.* 2015  Wu *et al.* 2014 |
| rs12195992 | C>G | Intron variant |
| rs12526686 | C>A,T | Intron variant | BP | Farzan *et al.* 2016 |
| CVD  CIMT | Wu *et al.* 2015  Wu *et al.* 2014 |
| rs1800665 | C>T | Intron variant |
| rs1800666 | C>T | Intron variant |
| rs2758331 | C>A | Intron variant |
| rs2758332 | C>A,T | Intron variant |
| rs2758334 | T>C | Intron variant |
| rs2758340 | C>A,T | Intron variant |
| rs2758345 | C>G | Intron variant |
| rs2842960 | C>T | Intron variant |
| rs2855116 | A>C | Intron variant | T2DM | Grau-Perez et al. 2018 |
| rs3798215 | T>C,G | Intron variant | CVD  CIMT | Wu *et al.* 2015  Wu *et al.* 2014 |
| rs4880 | A>G | Missense variant | HTN | Chen *et al.* 2011 |
| Hsueh *et al.* 2005 |
| T2DM | Grau-Perez et al. 2018 |
| rs5746088 | C>T | Intron variant | CVD  CIMT | Wu *et al.* 2015  Wu *et al.* 2014 |
| rs5746099 | T>C,G | Missense variant |
| rs5746104 | G>C,T | Intron variant |
| rs5746105 | A>G,T | Intron variant |
| rs5746108 | C>T | Intron variant |
| rs5746109 | T>C | Intron variant |
| rs5746110 | T>C | Intron variant |
| rs5746111 | C>G | Intron variant |
| rs5746114 | T>C | Intron variant |
| rs5746123 | C>T | Intron variant | DBP | Farzan *et al.* 2016 |
|  | CVD  CIMT | Wu *et al.* 2015  Wu *et al.* 2014 |
| rs5746136 | C>A,T | Intron variant |
| rs5746141 | C>T | Intron variant |
| rs6912979 | T>C | Intron variant |
| rs8031 | A>T | Intron variant |
| rs9457709 | G>A | Intron variant |
| *SOD3* | Superoxide Dismutase 3 | rs2284659 | T>G | None | T2DM | Grau-Perez et al. 2018 |
| rs2536512 | G>A,T | Missense variant |
| *TCF2* | Transcription factor 2 | rs1058166 | T>C | 3 Prime UTR variant | T2DM | Pan *et al.* 2013 |
| rs10962 | G>A,C | 3 Prime UTR variant |
| rs2688 | T>C,G | 3 Prime UTR variant |
| *TCF7L2* | Transcription factor 7-like 2 | rs12255372 | G>A,T | Intron variant | T2DM | Grau-Perez et al. 2018 |
| rs7901695 | T>C | Intron variant |
| *THADA* | Thyroid adenoma-associated protein | rs1549723 | C>A,T | Intron variant | T2DM | Pan *et al.* 2013 |
| rs17031056 | C>T | Missense variant |
| *TNF* | Tumor necrosis factor | rs17207127 | C>T | 2KB Upstream variant | CVD  CIMT | Wu *et al.* 2015  Wu *et al.* 2014 |
| rs17207134 | T>C | 2KB Upstream variant |
| rs1799964 | T>A | 2KB Upstream variant |
| rs1800610 | G>A | Intron variant |
| rs1800630 | C>A,G | 2KB Upstream variant | BP | Farzan *et al.* 2016 |
| CVD  CIMT | Wu *et al.* 2015  Wu *et al.* 2014 |
| rs2228088 | G>A,C,T | Synonymous variant |
| rs3093544 | A>G | 2KB Upstream variant |
| rs3093547 | T>A | 2KB Upstream variant |
| rs3093661 | G>A,C | Intron variant |
| rs3093662 | A>G | Intron variant |
| rs3093664 | A>G | Intron variant |
| rs3093665 | A>C | 3 Prime UTR variant |
| rs3179060 | C>A,T | Missense variant | BP | Farzan *et al.* 2016 |
| CVD  CIMT | Wu *et al.* 2015  Wu *et al.* 2014 |
| rs4248159 | C>A | 2KB Upstream variant | SBP | Farzan *et al.* 2016 |
| CVD  CIMT | Wu *et al.* 2015  Wu *et al.* 2014 |
| rs4645843 | C>G,T | Missense variant |
| *TNFA* | Tumor necrosis factor | rs1799964 | T>C | 2KB Upstream variant | T2DM | Grau-Perez et al. 2018 |
| *TNFRSF1A* | Tumor necrosis factor receptor 1 | rs1800693 | A>G | Intron variant | T2DM | Grau-Perez et al. 2018 |
| rs767455 | T>C | Synonymous variant |
| *TNFRSF1B* | TNF Receptor Superfamily Member 1B | rs1061628 | C>T | 3 Prime UTR variant | T2DM | Grau-Perez et al. 2018 |
| rs3397 | T>C | 3 Prime UTR variant |
| *TSPAN8* | Tetraspanin 8 | rs1051334 | A>C | Missense variant | T2DM | Pan *et al.* 2013 |
| *TXN* | Thioredoxin | rs1410051 | C>T | Intron variant | T2DM | Grau-Perez et al. 2018 |
| rs2301241 | C>T | 5 Prime UTR variant |
| rs2776 | A>G | 3 Prime UTR variant |
| rs4135168 | A>G | Intron variant |
| rs4135225 | C>T | Intron variant |
| rs749384 | A>G | 5 Prime UTR variant |
| *TXN2* | Thioredoxin 2 | rs2281082 | G>T | Intron variant | T2DM | Grau-Perez et al. 2018 |
| rs8139906 | C>G | Intron variant |
| *TXNRD1* | Thioredoxin Reductase 1 | rs4077561 | C>T | Intron variant | T2DM | Grau-Perez et al. 2018 |
| rs4964287 | C>T | Synonymous variant |
| rs5018287 | A>G | Intron variant |
| *TXNRD2* | Thioredoxin Reductase 2 | rs1139793 | A>G | Missense variant | T2DM | Grau-Perez et al. 2018 |
| rs1548357 | C>T | Intron variant |
| rs2020917 | C>T | Intron variant |
| rs2073750 | A>G | Intron variant |
| rs5992495 | G>T | Missense variant |
| rs740603 | A>G | Intron variant |
| rs756661 | C>T | Intron variant |
| *UCP1* | Uncoupling Protein 1 | rs12502572 | G>A | Intron variant | T2DM | Grau-Perez et al. 2018 |
| rs1800592 | T>C | 5 Prime UTR variant |
| rs3811787 | T>G | 5 Prime UTR variant |
| *UCP2* | Uncoupling Protein 2 | rs660339 | G>A | Missense variant | T2DM | Grau-Perez et al. 2018 |
| *UCP3* | Uncoupling Protein 3 | rs1800849 | G>A | 5 Prime UTR variant | T2DM | Grau-Perez et al. 2018 |
| rs2075577 | G>A | Synonymous variant |
| rs647126 | A>G | 3 Prime UTR variant |
| *UQCRB* | Ubiquinol-Cytochrome C Reductase Binding Protein | rs10504961 | C>T | 3 Prime UTR variant | T2DM | Grau-Perez et al. 2018 |
| *VCAM1* | Vascular cell adhesion protein 1 | rs1041163 | T>C | 2KB Upstream variant | CVD  CIMT | Wu *et al.* 2015  Wu *et al.* 2014 |
| rs1409419 | T>A,C,G | 2KB Upstream variant |
| rs2209627 | A>G | Intron variant |
| rs2392221 | C>T | Intron variant |
| rs3170794 | T>C | 2KB Upstream variant |
| rs3176859 | G>T | Intron variant |
| rs3176860 | A>C,G | Intron variant |
| rs3176861 | C>T | Intron variant |
| rs3176862 | C>G | Intron variant |
| rs3176863 | G>A,C | Intron variant |
| rs3176867 | C>A,T | Intron variant |
| rs3176870 | G>A | Intron variant |
| rs3176871 | A>C,G,T | Intron variant |
| rs3176874 | A>G | Intron variant |
| rs3176876 | A>C,G | Intron variant |
| rs3176877 | A/C | Intron variant | BP | Farzan *et al.* 2016 |
| CVD | Wu *et al.* 2015 |
| rs3176878 | A>C,G | Intron variant |
| rs3181087 | A>T | 2KB Upstream variant |
| rs3181088 | C>T | Intron variant |
| rs3181089 | C>A,T | Intron variant |
| rs3181092 | A>G | 500B Downstream variant |
| rs3765685 | A>G | Intron variant |
| rs3783597 | C>G,T | 2KB Upstream variant |
| rs3783599 | C>T | 2KB Upstream variant |
| rs3783601 | A>G,T | 2KB Upstream variant |
| rs3783603 | G>A | 2KB Upstream variant |
| rs3783606 | T>G | 2KB Upstream variant |
| rs3783609 | G>A | 5 Prime UTR variant |
| rs3783613 | G>A,C | Missense variant |
| rs3783617 | G>C | 3 Prime UTR variant | BP | Farzan *et al.* 2016 |
| CVD  CIMT | Wu *et al.* 2015  Wu *et al.* 2014 |
| rs3783624 | A>G | 500B Upstream variant |
| rs3917009 | C>T | Intron variant |
| rs3917010 | A>C,G | Intron variant |
| rs3917014 | A>G | Intron variant |
| rs3917016 | T>A | Intron variant |
| rs3917018 | A>C,G,T | Intron variant |
| rs3917019 | A>C,G,T | Intron variant |
| rs3917022 | T>C | 500B Upstream variant |
| rs3917026 | T>A,C | 2KB Upstream variant |
| rs3917032 | C>A | Intron variant |
| rs3917033 | T>C | Intron variant |
| rs3917057 | A>G | Intron variant |
| *WFS1* | Wolframin ER Transmembrane Glycoprotein | rs1801208 | G>A | Missense variant | T2DM | Pan *et al.* 2013 |
| rs1801212 | G>A,C,T | Missense variant |
| rs734312 | G>A,C | Missense variant |
| *WWOX* | WW Domain Containing Oxidoreductase | rs1465099 | A>C,G,T | Intron variant | T2DM | Grau-Perez et al. 2018 |
| *XDH* | Xanthine Dehydrogenase | rs10187719 | T>A,C | Intron variant | T2DM | Grau-Perez et al. 2018 |
| rs1042039 | T>C | 3 Prime UTR variant |
| rs1429374 | A>G | Intron variant |
| rs206812 | C>A,T | 5 Prime UTR variant |
| rs2073316 | G>A,C | Intron variant |
| rs6710015 | T>A,C | 3 Prime UTR variant |
| rs6752058 | C>A,G,T | 3 Prime UTR variant |
| rs761926 | C>G,T | Intron variant |

***Abbreviations:* BP**, blood pressure; **CA**, carotid atherosclerosis; **CIMT**, carotid intima media thickness, **CVD**, cardiovascular disease; **DBP**, diastolic blood pressure; **DM**, diabetes mellitus; **T2DM**, diabetes mellitus type 2; **ECG** abnor, electrocardiogram abnormality; **MetS**, metabolic syndrome; **rsID**, SNP identification number; **SBP**, systolic blood pressure; **UTR**, untranslated region

| **Supplement Table 6 Quality assessment of cohort or case-cohort studies (n=6).** | | | | | | |
| --- | --- | --- | --- | --- | --- | --- |
| **Quality criteria** | Chen *et al.* 2012b1 | Farzan *et al.* 20162 | Grau-Perez *et al.* 20173 | Liao *et al.* 20094 | Pan *et al.* 20135 | Wu *et al.* 20156 |
| **Selection** | | | | | | |
| Representativeness of exposed cohort | ■ | ■ | ■ | ■ | □ | ■ |
| Non-exposed drawn from the same population as exposed | ■ | ■ | ■ | □ | ■ | ■ |
| Demonstration that outcome of interest was not present at start of study | ■ | ■ | ■ | □ | ■ | ■ |
| **Environmental exposure** | | | | | | |
| Measured at individual or household level | ■ | ■ | ■ | ■ | ■ | ■ |
| Use of biomarker (internal dose) | ■ | □ | ■ | □ | □ | ■ |
| Media (Urine [U], Toenail [T], Water [W], blood [B]) | U | W | U | W | W | U |
| Measurement of chronic exposure (i.e., single [S], average of multiple [M], cumulative [C]) | S | S | S | M, C | S | S |
| Same exposure ascertainment for exposed and non-exposed | ■ | ■ | ■ | ■ | ■ | ■ |
| **Genetic exposure** | | | | | | |
| Appropriate rationale for chosen candidate genes | ■ | ■ | ■ | ■ | ■ | ■ |
| Genotyping platform and allele-calling algorithm appropriate | ■ | ■ | ■ | ■ | ■ | ■ |
| Genotyping error and call rates appropriate (<95% poor genotyping) | -- | ■ | ■ | -- | ■ | ■ |
| Agreement with Hardy Weingberg equilibrium tested in controls | □ | □ | ■ | ■ | ■ | ■ |
| Was genotyping conducted by a blinded assessor | -- | -- | -- | -- | -- | -- |
| Where the results adjusted for multiple testing to avoid false positive results | □ | ■ | □ | □ | ■ | ■ |
| **Comparability** | | | | | | |
| Individual-level adjustment factors | □□ | ■■ | ■■ | ■□ | ■■ | ■■ |
| **Outcome** | | | | | | |
| Outcome assessment through Record linkage [R], independent Blind Assessment [BA/A] or self-report [S] | ■ A | ■ A(a) S | ■ A(a) S | ■ BA | ■ A | ■B |
| Follow-up long enough for outcomes to occur | ■ | ■ | ■ | ■ | ■ | ■ |
| Adequate follow-up of cohorts (i.e., complete follow-up or unlikely to introduce bias) | -- | ■ | -- | □ | -- | -- |
| Loss to follow up independent of exposure | -- | -- | -- | -- | -- | -- |
| Intensity of case ascertainment independent of exposure | ■ | ■ | ■ | ■ | ■ | ■ |

***See notes below.***

***Notes:***  To allow for the incorporation of the environment-gene-disease interaction in individual study quality assessment, methodological quality was assessed using study-design specific (cohort, case-control, cross-sectional) adapted versions of a combination between the quality assessment tool developed by Moon *et al.* 20177 - based on the Newcastle-Ottawa scale (NOS)8 – and the Q-genie tool for the quality assessment of genetic association studies.9

■ Indicates that the study fulfilled the corresponding quality criterion. □ Indicates that the study did not fulfil the corresponding quality criterion. -- Indicates that information on the corresponding quality criterion is not clearly reported in the study.

Except for the “*comparability*” section where studies could receive two squares, a maximum of a single square could be obtained per quality criterion.7In the “*comparability*” section one square is assigned when adjusting for age, sex, and education or socio-economic status. Two squares are assigned if the study further adjusted for socio-demographic, and lifestyle factors (i.e., smoking, BMI). Note, when sample collection to assess arsenic exposure and health examination occurred at the same moment in time, physicians were considered inherently blinded to the exposure status of the individuals.

When the original cohort study was described elsewhere, this was used to answer some of the quality questions. (a) Unclear whether the independent assessor was blinded or not.

|  |  | **Supplement Table 7 Quality assessment of included (nested) case-control studies (n=5).** | | | | |  |
| --- | --- | --- | --- | --- | --- | --- | --- |
| **Quality criteria** | | | Fan *et al.* 202210 | Hsieh *et al.* 200711 | Hsieh *et al.* 201112 | Hsueh *et al.* 200513 | Wang *et al*. 200714 |
| **Selection** | | | | | | | |
| Consecutive or obvious representative cases | | | ■ | ■ | ■ | ■ | ■ |
| Case definition with independent validation | | | ■ | -- | -- | -- | -- |
| Cases are interviewed within 6 months of diagnosis | | | -- | -- | -- | -- | -- |
| Use of community controls | | | ■ | ■ | ■ | ■ | ■ |
| If hospital-based controls, condition not related to exposure | | | NA | NA | NA | NA | NA |
| If hospital-based controls, similar referral pattern as cases | | | NA | NA | NA | NA | NA |
| Controls selected without history of the outcome | | | -- | ■ | ■ | ■ | ■ |
| Controls who developed the disease would be cases | | | ■ | ■ | ■ | ■ | ■ |
| Same exclusion criteria are applied to all cases and controls | | | ■ | ■ | ■ | ■ | ■ |
| **Environmental exposure** | | | | | | | |
| Measured at individual or household level | | | ■ | ■ | ■ | ■ | ■ |
| Use of biomarker (internal dose) | | | ■ | □ | ■ | □ | □ |
| Media (Urine [U], Toenail [T], Water [W], Blood [B]) | | | U | W | U | W | W |
| Measurement of chronic exposure (i.e., single [S], average of multiple [M], cumulative [C]) | | | S | S | S | M, C | S |
| Same exposure ascertainment for cases and controls | | | ■ | ■ | ■ | ■ | ■ |
| Time of data collection same for cases and controls | | | ■ | -- | -- | -- | ■ |
| Exposure is measured blind to case/control status | | | -- | ■ | ■ | ■ | ■ |
| Non-response rate is similar to both groups | | | -- | -- | -- | -- | ■ |
| **Genetic exposure** | | | | | | | |
| Appropriate rationale for chosen candidate genes | | | ■ | ■ | ■ | ■ | ■ |
| Genotyping platform and allele-calling algorithm appropriate | | | ■ | ■ | ■ | ■ | ■ |
| Genotyping error and call rates appropriate (<95% poor genotyping) | | | -- | -- | ■ | ■ | ■ |
| Agreement with Hardy Weinberg equilibrium tested in controls | | | ■ | -- | ■ | -- | ■ |
| Was genotyping conducted by a blinded assessor | | | -- | ■ | -- | ■ | -- |
| Where the results adjusted for multiple testing to avoid false positive results | | | -- | ■ | □ | □ | □ |
| **Comparability** | | | | | | | |
| Individual-level adjustment factors | | | ■□ | ■□ | ■■ | ■□ | □□ |
| **Outcome** | | | | | | | |
| Assessment of outcome through objective tests or standard criteria | | | ■ | ■ | ■ | ■ | ■ |
| ***See notes below.*** | | | | | | | |

***Notes:***  To allow for the incorporation of the environment-gene-disease interaction in individual study quality assessment, methodological quality was assessed using study-design specific (cohort, case-control, cross-sectional) adapted versions of a combination between the quality assessment tool developed by Moon *et al.* 20177 - based on the Newcastle-Ottawa scale (NOS)8 – and the Q-genie tool for the quality assessment of genetic association studies.9

■ Indicates that the study fulfilled the corresponding quality criterion.

□ Indicates that the study did not fulfil the corresponding quality criterion.

-- Indicates that information on the corresponding quality criterion is not clearly reported in the study.

Except for the “*comparability*” section where studies could receive two squares, a maximum of a single square could be obtained per quality criterion.7 In the “*comparability*” section one square is assigned when adjusting for age, sex, and education or socio-economic status. Two squares are assigned if the study further adjusted for further socio-demographic, and lifestyle factors (i.e., smoking, BMI). Note, when sample collection to assess arsenic exposure and health examination occurred at the same moment in time, physicians were considered inherently blinded to the exposure status of the individuals.

|  | **Supplement Table 8 Quality assessment of included cross-sectional studies (n=7).** | | | | | | |  |
| --- | --- | --- | --- | --- | --- | --- | --- | --- |
| **Quality criteria** | | Chen *et al.* 2012a15 | Drobná *et al.* 201216 (e) | Gao *et al.* 201817 | Grau-Perez *et al.* 201818 (d) | Liang *et al.* 202319 (c) | Martíz-Barquero *et al.* 201520 | Wu *et al.* 201421 (b) |
| **Selection** | | | | | | | | |
| Sample is representative or somewhat representative of the average in the target population | | ■ | ■ | □ | ■ | ■ | ■ | ■ |
| Sample size is justified (i.e., based on pre-study consideration of statistical power) and satisfactory | | □ | □ | □ | □ | □ | □ | □ |
| The way the sample is obtained has limited chance to introduce (selection) bias | | -- | -- | □ | ■ | -- | -- | ■ |
| Characteristics of respondents are comparable to characteristics of non-respondents | | -- | -- | -- | ■ | -- | -- | -- |
| The response rate is satisfactory | | -- | -- | -- | □ 33.5% | -- | -- | -- |
| **Environmental arsenic exposure** | | | | | | | | |
| Measured at individual or household level | | ■ | ■ | ■ | ■ | ■ | ■ | ■ |
| Use of biomarker (internal dose) | | ■ | □ | ■ | ■ | ■ | ■ | ■ |
| Media (Urine [U], Toenail [T], Water [W], Blood [B], blood Plasma [P]) | | U | W | B | U | U | P | W U |
| Measurement of chronic exposure (i.e., single [S], average of multiple [M], cumulative [C], other [O]) | | S | S | S | S | S | S | S |
| Exposure is measured using a validated tool | | ■ | ■ | ■ | ■ | ■ | ■ | ■ |
| **Genetic exposure** | | | | | | | | |
| Appropriate rationale for chosen candidate genes | | ■ | ■ | ■ | ■ | ■ | ■ | ■ |
| Genotyping platform and allele-calling algorithm appropriate | | ■ | ■ | ■ | ■ | ■ | ■ | ■ |
| Genotyping error and call rates appropriate (<95% poor genotyping) | | -- | ■ | -- | ■ | ■ | -- | ■ |
| Agreement with HWe tested in controls | | ■ | ■ | □ | ■ | -- | ■ | ■ |
| Was genotyping conducted by a blinded assessor | | -- | -- | -- | □ | -- | -- | -- |
| Where the results adjusted for multiple testing to avoid false positive results | | □ | □ | ■ | □ | □ | ■ | ■ |
| **Comparability** | | | | | | | | |
| Individual-level adjustment factors | | ■□ | ■□ | ■■ | ■■ | ■■ | □□ | ■■ |
| **Outcome** | | | | | | | | |
| Outcome assessment through Record linkage [R], independent Blind Assessment [BA/A] or self-report [S] | | ■ A(a) S | ■ A(a) S | ■ A(a) | ■ A(a) | ■ A(a) | -- | ■ BA |
| Statistical analyses are clearly described and appropriate | | ■ | ■ | ■ | ■ | ■ | ■ | ■ |
| MoA is presented, including confidence intervals and the probability level (*P*-value) | | ■ | ■ | ■ | ■ | ■ | ■ | ■ |

***See notes below.***

***Notes:***  To allow for the incorporation of the environment-gene-disease interaction in individual study quality assessment, methodological quality was assessed using study-design specific (cohort, case-control, cross-sectional) adapted versions of a combination between the quality assessment tool developed by Moon *et al.* 20177 - based on the Newcastle-Ottawa scale (NOS)8 – and the Q-genie tool for the quality assessment of genetic association studies.9

■ Indicates that the study fulfilled the corresponding quality criterion. □ Indicates that the study did not fulfil the corresponding quality criterion. -- Indicates that information on the corresponding quality criterion is not clearly reported in the study.

Except for the “*comparability*” section where studies could receive two squares, a maximum of a single square could be obtained per quality criterion.7 In the “*comparability*” section one square is assigned when adjusting for age, sex, and education or socio-economic status. Two squares are assigned if the study further adjusted for further socio-demographic, and lifestyle factors (i.e., smoking, BMI). Note, when sample collection to assess arsenic exposure and health examination occurred at the same moment in time, physicians were considered inherently blinded to the exposure status of the individuals.

(a) Unclear whether the independent assessor was blinded or not.

If a study was described in detail elsewhere and was referenced in the publication, this was used to provide answers to some of the questions. For example; (b) some of the information is based on the original description of the HEALS study as described by Ahsan *et al.* 2006, (c) the Hortega cohort as described by Mena-Martin *et al.* 2003, (d) the cross-sectional study of pregnant women described by Li *et al*. 2019, (e) the study described by Del Razo *et al.* 2011

**References**

1 Chen JW, Wang SL, Wang YH, *et al.* Arsenic methylation, GSTO1 polymorphisms, and metabolic syndrome in an arseniasis endemic area of southwestern Taiwan. *Chemosphere* 2012; **88**: 432–8.

2 Farzan SF, Karagas MR, Jiang J, *et al.* Gene-arsenic interaction in longitudinal changes of blood pressure: Findings from the Health Effects of Arsenic Longitudinal Study (HEALS) in Bangladesh. *Toxicol Appl Pharmacol* 2015; **288**: 95–105.

3 Grau-Perez M, Kuo C-C, Gribble MO, *et al.* Association of Low-Moderate Arsenic Exposure and Arsenic Metabolism with Incident Diabetes and Insulin Resistance in the Strong Heart Family Study. *Environ Health Perspect* 2017; **125**. DOI:10.1289/EHP2566.

4 Liao YT, Li WF, Chen CJ, *et al.* Synergistic effect of polymorphisms of paraoxonase gene cluster and arsenic exposure on electrocardiogram abnormality. *Toxicol Appl Pharmacol* 2009; **239**: 178–83.

5 Pan WC, Kile ML, Seow WJ, *et al.* Genetic susceptible locus in NOTCH2 interacts with arsenic in drinking water on risk of type 2 diabetes. *PLoS One* 2013; **8**: e70792.

6 Wu F, Jasmine F, Kibriya MG, *et al.* Interaction between arsenic exposure from drinking water and genetic polymorphisms on cardiovascular disease in Bangladesh: A prospective case-cohort study. *Environ Health Perspect* 2015; **123**: 451–7.

7 Moon KA, Oberoi S, Barchowsky A, *et al.* A dose-response meta-analysis of chronic arsenic exposure and incident cardiovascular disease. *Int J Epidemiol* 2017; **46**: 1924–39.

8 Wells G, Shea B, O’Connell D, *et al.* The Newcastle-Ottawa Scale (NOS) for assessing the quality of nonrandomised studies in meta-analyses. *OHRI* http://www.ohri.ca/programs/clinical_epidemiology/oxford.asp (accessed Aug 12, 2021).

9 Sohani ZN, Meyre D, de Souza RJ, *et al.* Assessing the quality of published genetic association studies in meta-analyses: the quality of genetic studies (Q-Genie) tool. *BMC Genet* 2015; **16**. DOI:10.1186/S12863-015-0211-2.

10 Fan C, Zhan Z, Zhang X, *et al.* Research for type 2 diabetes mellitus in endemic arsenism areas in central China: role of low level of arsenic exposure and KEAP1 rs11545829 polymorphism. *Arch Toxicol* 2022; **96**: 1673–83.

11 Hsieh Y-C, Hsieh F-I, Lien L-M, Chou Y-L, Chiou H-Y, Chen C-J. Risk of carotid atherosclerosis associated with genetic polymorphisms of apolipoprotein E and inflammatory genes among arsenic exposed residents in Taiwan. 2007. DOI:10.1016/j.taap.2007.10.013.

12 Hsieh YC, Lien LM, Chung WT, *et al.* Significantly increased risk of carotid atherosclerosis with arsenic exposure and polymorphisms in arsenic metabolism genes. *Environ Res* 2011; **111**: 804–10.

13 Hsueh YM, Lin PP, Chen HW, *et al.* Genetic polymorphisms of oxidative and antioxidant enzymes and arsenic-related hypertension. *J Toxicol Environ Heal - Part A* 2005; **68**: 1471–84.

14 Wang Y-H, Wu M-M, Hong C-T, *et al.* Effects of arsenic exposure and genetic polymorphisms of p53, glutathione S-transferase M1, T1, and P1 on the risk of carotid atherosclerosis in Taiwan. *Atherosclerosis* 2007; **192**: 305–12.

15 Chen SC, Chen CC, Kuo CY, *et al.* Elevated risk of hypertension induced by arsenic exposure in Taiwanese rural residents: possible effects of manganese superoxide dismutase (MnSOD) and 8-oxoguanine DNA glycosylase (OGG1) genes. *Arch Toxicol* 2012; **86**: 869–78.

16 Drobná Z, Del Razo LM, García-Vargas GG, *et al.* Environmental exposure to arsenic, AS3MT polymorphism and prevalence of diabetes in Mexico. *J Expo Sci Environ Epidemiol* 2013; **23**: 151–5.

17 Gao Y, Zhao Z, Yang L, *et al.* Arsenic exposure assists ccm3 genetic polymorphism in elevating blood pressure. *Oncotarget* 2018; **9**: 4915–23.

18 Grau-Perez M, Navas-Acien A, Galan-Chilet I, *et al.* Arsenic exposure, diabetes-related genes and diabetes prevalence in a general population from Spain. *Environ Pollut* 2018; **235**: 948–55.

19 Liang X, Guo G, Wang Y, *et al.* Arsenic metabolism, N6AMT1 and AS3MT single nucleotide polymorphisms, and their interaction on gestational diabetes mellitus in Chinese pregnant women. *Environ Res* 2023; **221**: 115331.

20 Martínez-Barquero V, De Marco G, Martínez-Hervas S, *et al.* Polymorphisms in Endothelin System Genes, Arsenic Levels and Obesity Risk. *PLoS One* 2015; **10**: e0118471.

21 Wu F, Jasmine F, Kibriya MG, *et al.* Interaction between arsenic exposure from drinking water and genetic susceptibility in carotid intima-media thickness in Bangladesh. *Toxicol Appl Pharmacol* 2014; **276**: 195–203.
